# Supplementary material
Source: publisher figshare collection journal article supplement (https://gsajournals.figshare.com/articles/dataset/_/13103411)
Supplement: Supplementary file 1 [file 1]

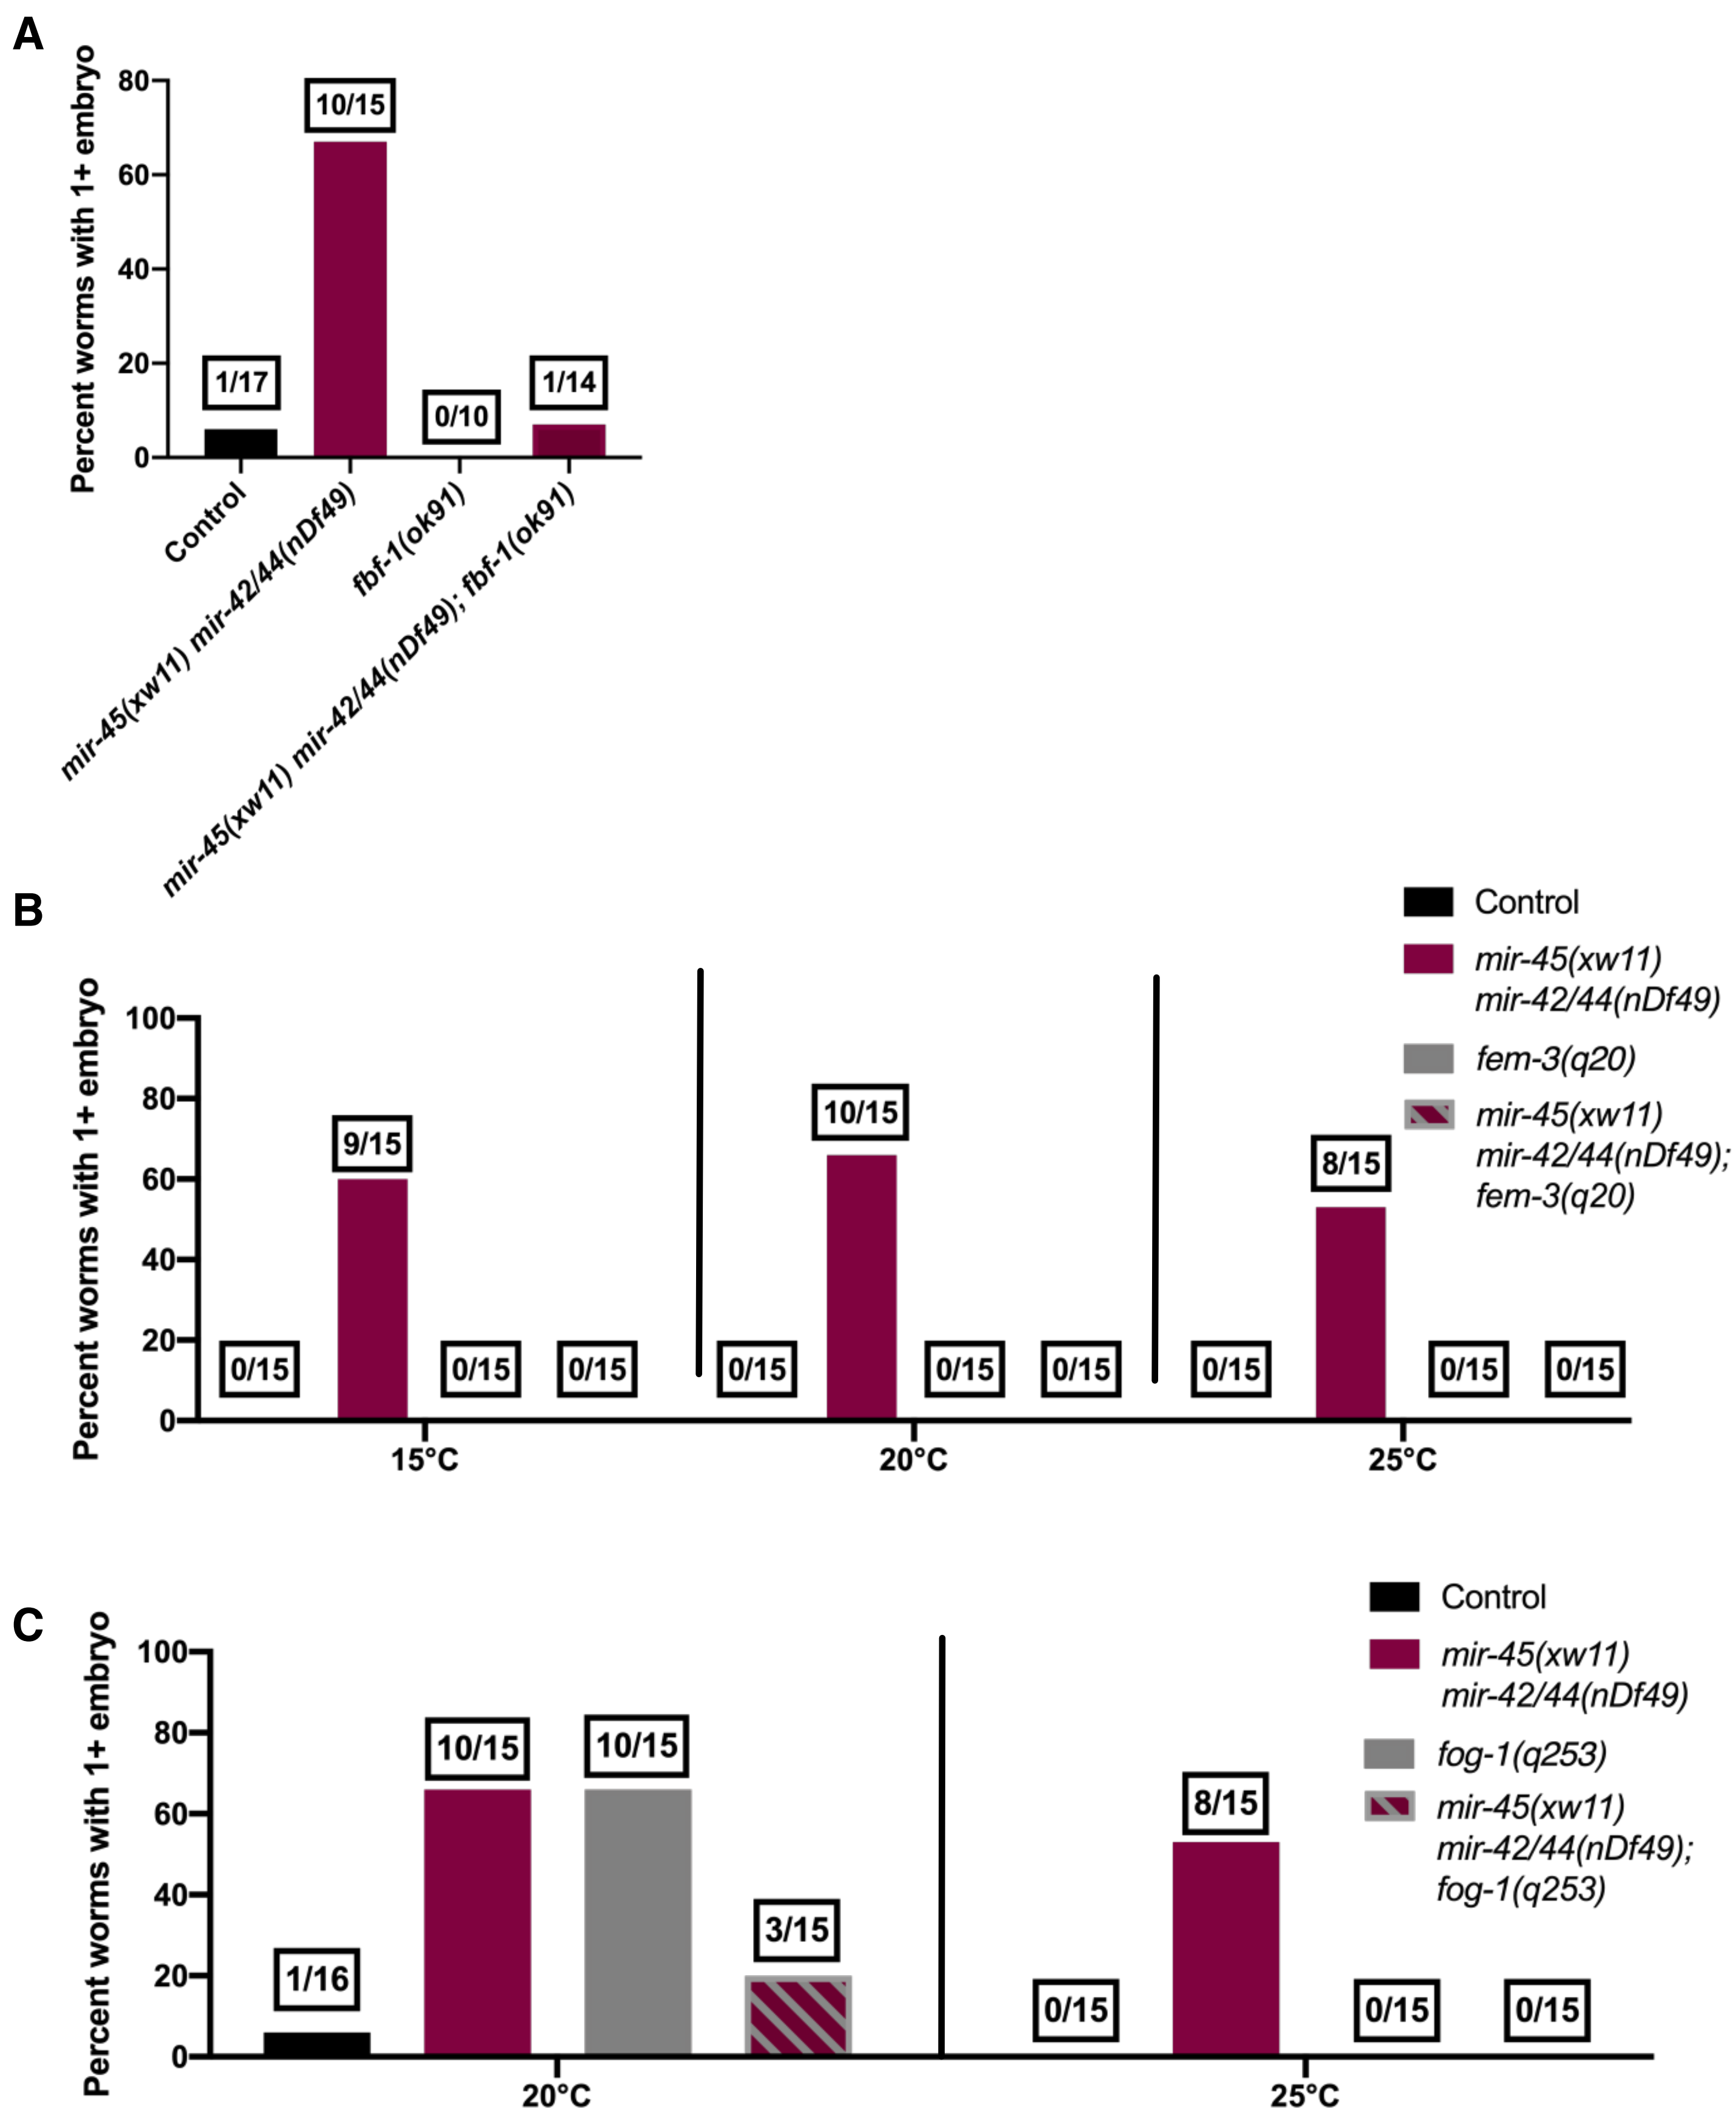

**Figure S4. *mir-44* and *mir-45* modulate the onset of oogenesis.** (A, B, C) Percent of worms with more than one embryo at L4m+7.5 hrs for 15 degrees C, 5 hrs for 20 degrees C, and 3.75 hrs for 25 degrees C.  $n > 10$ . Box above bars indicates the number of worms assayed with one or more embryos.
