# Supplementary material
Source: publisher figshare collection journal article supplement (https://gsajournals.figshare.com/articles/dataset/_/13103411)
Supplement: Supplementary file 1 [file 1]

## Sheet: Table S1
Table S4. Computationally predicted mir-44 family germline expressed target genes.
	WormBase Gene ID	Public Name	Sequence Name	Other Name	Transcript	Operon	Genetic Map Position	Concise Description
> 0.99	WBGene00000110	alh-4	T05H4.13	CELE_T05H4.13	T05H4.13c.1, T05H4.13c.2, T05H4.13b.1, T05H4.13b.2, T05H4.13a.1, T05H4.13a.2	CEOP5108	V -0.178101	N.A.
> 0.99	WBGene00000156	apr-1	K04G2.8	APC, CELE_K04G2.8	K04G2.8b.1, K04G2.8c.1, K04G2.8a.1	N.A.	I 2.437709	The apr-1 gene encodes an ortholog of human APC (OMIM:175100, mutated in familial adenomatous polyposis) that is required for germline fertility, the control of homeodomain expression (CEH-13 and LIN-39) during embryogenesis and vulval development, and for the migration and elongation of hypodermal cells during embryo morphogenesis\; APR-1 is thought to reside in adherens junctions, while also st…
> 0.99	WBGene00007267	C03A3.2	C03A3.2	CELE_C03A3.2	C03A3.2.1	N.A.	X 2.865084	N.A.
0.98	WBGene00008311	rskn-2	C54G4.1	CELE_C54G4.1	C54G4.1d.1, C54G4.1c.1, C54G4.1a.1, C54G4.1b.1	CEOP1444	I 2.419347	N.A.
0.97	WBGene00006763	unc-26	JC8.10	unc-48, CELE_JC8.10	JC8.10c.1, JC8.10c.2, JC8.10d.1, JC8.10b.1, JC8.10a.1	CEOP4539	IV 8.514012	unc-26 encodes synaptojanin, a polyphosphoinositide phosphatase orthologous to human synaptojanin 1 (OMIM:604297, 309000, which when mutated leads to Lowe oculocerebrorenal syndrome)\; UNC-26 is required for normal locomotion, pharyngeal pumping, and defecation, and specifically, appears to function in multiple steps of synaptic vesicle recycling\; UNC-26 may also play a role in cytoskeletal orga…
0.97	WBGene00013694	Y106G6A.1	Y106G6A.1	CELE_Y106G6A.1	Y106G6A.1.1, Y106G6A.1.2	CEOP1568	I 4.076144	N.A.
0.97	WBGene00015942	osta-2	C18A3.4	CELE_C18A3.4	C18A3.4b, C18A3.4c, C18A3.4a.1, C18A3.4a.2	N.A.	II -0.964820	N.A.
0.97	WBGene00016384	cdgs-1	C33H5.18	CELE_C33H5.18	C33H5.18b.1, C33H5.18b.2, C33H5.18a.1, C33H5.18a.2	CEOP4260	IV 3.489470	C33H5.18 encodes a CDP-diglyceride synthetase ortholog required for locomotion and osmoregulation\; given its biochemical function in other organisms, C33H5.18 is expected to catalyse synthesis of cytidine diphosphate-diacylglycerol (CDP-DAG), an activated precursor for anionic and zwitterionic phospholipids, and is likely to regulate phosphatidylinositol lipid signalling\; one might expect loss …
0.97	WBGene00017931	picc-1	F29G9.2	CELE_F29G9.2	F29G9.2a.1, F29G9.2a.2, F29G9.2b.1, F29G9.2b.2	CEOP5096	V -0.440602	N.A.
0.97	WBGene00019504	K07H8.2	K07H8.2	CELE_K07H8.2	K07H8.2b.1, K07H8.2b.2, K07H8.2a.1, K07H8.2a.2, K07H8.2c.1, K07H8.2c.2, K07H8.2c.3	CEOP4280	IV 3.705040	K07H8.2 encodes, by alternative splicing, three isoforms of an ortholog of human SLC41A1 (OMIM:610801) and bacterial MgtE\; like its orthologs, K07H8.2 is predicted to transport Mg(2+) into cells\; K07H8.2 is paralogous to ZK185.2 and ZK1053.6\; K07H8.2 is expressed in intestine, but has no obvious function in mass RNAi assays.
0.97	WBGene00022251	blos-2	Y73B6BL.30	CELE_Y73B6BL.30	Y73B6BL.30a.1, Y73B6BL.30b.1	CEOP4176	IV 3.170280	N.A.
0.96	WBGene00001559	gei-1	F45H7.2	CELE_F45H7.2	F45H7.2b.1, F45H7.2a.1, F45H7.2d.1, F45H7.2d.2, F45H7.2c.1	N.A.	III -7.214148	gei-1 encodes a protein containing a RhoGAP domain and a START (StAR-related lipid-transfer) domain and interacts with GEX-2 in yeast two-hybrid assays.
0.96	WBGene00002036	hum-2	F36D4.3	CELE_F36D4.3	F36D4.3a.1, F36D4.3b.1, F36D4.3g.1, F36D4.3g.2, F36D4.3h.1, F36D4.3h.2, F36D4.3i.1, F36D4.3j.1, F36D4.3k.1, F36D4.3c.1, F36D4.3c.2, F36D4.3e.1, F36D4.3f.1	CEOP5228	V 2.018613	hum-2 encodes a class V unconventional myosin similar to human MYO5A, MYO5B and MYO5C.
0.96	WBGene00004680	rars-2	C29H12.1	rrt-2, CELE_C29H12.1	C29H12.1.1	CEOP2236	II -0.460138	N.A.
0.96	WBGene00008750	F13E9.1	F13E9.1	CELE_F13E9.1	F13E9.1.1	CEOP4396	IV 4.724684	N.A.
0.96	WBGene00009563	F39H2.3	F39H2.3	CELE_F39H2.3	F39H2.3.1, F39H2.3.2	CEOP1496	I 3.017052	N.A.
0.96	WBGene00012182	osta-3	W01D2.5	CELE_W01D2.5	W01D2.5a.1, W01D2.5a.2, W01D2.5a.3, W01D2.5b.1, W01D2.5b.2	N.A.	II 23.529800	N.A.
0.96	WBGene00013689	bath-40	Y105E8B.4	Y105E8B.g, Y105E8B.g, CELE_Y105E8B.4	Y105E8B.4.1	CEOP1744	I 25.950251	N.A.
0.96	WBGene00015328	C02B10.3	C02B10.3	CELE_C02B10.3	C02B10.3.1	N.A.	IV 1.449489	C02B10.3 encodes a predicted secreted protein containing EGF-like repeats.
0.96	WBGene00016614	trpp-12	C43H6.1	CELE_C43H6.1	C43H6.1.1	CEOPX028	X -15.567100	N.A.
0.96	WBGene00020867	shc-2	T27F7.2	CELE_T27F7.2	T27F7.2a.1, T27F7.2b.1, T27F7.2b.2, T27F7.2c.1, T27F7.2c.2	N.A.	II -2.608707	T27F7.2 encodes three proteins by multiple splicing, two of which (T27F7.2A-B) are fully orthologous to vertebrate Shc proteins (e.g., p52\/p46SHC and p66SHC)\; like their orthologs, T27F7.2A-B have a PTB and an SH2 domain in N- to C-terminal order\; T27F7.2 is expressed in gastrulating embryos (probably in neural precursors)\; T27F7.2 might be involved in RAS signal transduction or regulation of…
0.96	WBGene00021834	mab-31	Y54E10A.16	CELE_Y54E10A.16	Y54E10A.16.1	N.A.	I -4.350777	mab-31 encodes a novel protein that is highly conserved amongst nematodes\; mab-31 functions in the TGF-beta signaling pathway to regulate the male tail ray patterning process, specifically the positioning of the R7-derived ray cell cluster\; a mab-31::gfp reporter is expressed in a wide variety of tissues, including the intestine, hypodermis, pharynx, and neuronal support cells\; in males, mab-3…
0.96	WBGene00022776	perm-3	ZK616.6	emc-4, emc-4, ZK616.e, ZK616.e, ZK616.g, ZK616.g, CELE_ZK616.6	ZK616.6a.1, ZK616.6b.1	N.A.	IV 1.650702	N.A.
0.96	WBGene00044094	fitm-2	ZK265.9	CELE_ZK265.9	ZK265.9.1, ZK265.9.2	N.A.	I 2.703370	fitm-2 encodes an ortholog of FIT1 and FIT2, membrane proteins of the endoplasmic reticulum that both induce, and are required for, lipid droplet accumulation\; more distantly, FITM-2 is orthologous to budding yeast Scs3p and Yft2p.
0.95	WBGene00000566	cnt-2	Y39A1A.15	cnt-2a, cnt-2b, CELE_Y39A1A.15	Y39A1A.15d.1, Y39A1A.15b.1, Y39A1A.15b.2, Y39A1A.15a.1, Y39A1A.15e.1, Y39A1A.15c.1, Y39A1A.15f.1, Y39A1A.15g.1	CEOP3692	III 4.394076	cnt-2 encodes an Arf GTPase-activating protein (GAP) of the AGAP family\; cnt-2 is required for asymmetric cell divisions\; genetic analyses suggest that cnt-2 influences asymmetric cell divisions through regulation of receptor-mediated endocytosis and regulation of actomyosin dynamics at the cell cortex.
0.95	WBGene00001453	flp-10	T06C10.4	CELE_T06C10.4	T06C10.4.1	N.A.	IV 3.493623	flp-10 encodes a FMRFamide-related neuropeptide\; in males, flp-10 activity is required for a sensory transduction pathway that negatively regulates the frequency of certain substeps of turning behavior during mating\; a flp-10::gfp reporter is expressed in a number of neurons including AIM, ASI, AUA, BAG, BDU, DVB, PQR, PVR, and URX, and in the vulD cells.
0.95	WBGene00001679	gpb-1	F13D12.7	CELE_F13D12.7	F13D12.7a.1, F13D12.7a.2, F13D12.7b.1	N.A.	II 4.028148	gpb-1 encodes a heterotrimeric G protein beta subunit that is required during embryonic development for the proper orientation of the mitotic spindle during early cell divisions and thus affects the orientation of early cell division axes, and is also required for larval viability, negatively regulates locomotion and egg-laying, and may affect germline development and osmotic balance\; expressed …
0.95	WBGene00004078	pos-1	F52E1.1	CELE_F52E1.1	F52E1.1.1	N.A.	V 1.403067	pos-1 encodes a CCCH-type zinc-finger protein\; during embryogenesis, maternally provided POS-1 is essential for proper fate specification of germ cells, intestine, pharynx, and hypodermis\; POS-1's role in cell fate specification is likely as a translational regulator, as POS-1 is required, in posterior blastomeres, for positive regulation of apx-1 mRNA translation and negative regulation of glp…
0.95	WBGene00004147	larp-5	T12F5.5	pqn-64, larp-2, larp-2, T12F5.h, T12F5.h, CELE_T12F5.5	T12F5.5a.1, T12F5.5b.1, T12F5.5b.2	N.A.	I -2.749020	larp-5 encodes an La-related protein containing an La RNA-binding motif and a conserved LARP5 domain\; LARP-5 is most closely related to the Larp5 family of metazoan-specific La proteins that includes human and mouse Larp5 as well as Drosophila melanogaster CG11505.
0.95	WBGene00004286	rab-39	D2013.1	CELE_D2013.1	D2013.1.1	N.A.	II 1.159267	rab-39 encodes a small, monomeric Rab GTPase that is most closely related to the human and Drosophila Rab39 GTPases\; by homology, RAB-39 is predicted to function as a membrane-associated GTPase required for intracellular vesicular trafficking and for regulation of endo- and exocytosis\; however, as loss of rab-39 function via RNA-mediated interference (RNAi) does not result in any obvious abnorm…
0.95	WBGene00006478	tag-131	H38K22.3	CELE_H38K22.3	H38K22.3.1	CEOP3172	III -3.191395	N.A.
0.95	WBGene00015404	nstp-4	C03H5.2	CELE_C03H5.2	C03H5.2.1	CEOP2707	II -15.614670	nstp-4 encodes a transporter of UDP-N-acetylglucosamine (UDP-GlcNAc) and UDP-N-acetylgalactosamine (UDP-GalNAc), orthologous to human SLC35A3 (OMIM:605632)\; NSTP-4 is redundantly required, with its paralog SRF-3, for normal progression of oocytes through proximal gonads and for normal gonad morphology\; nstp-4 is expressed in many tissues, including pharynx, intestine, pharyngeal gland cells, se…
0.95	WBGene00015754	C14B9.8	C14B9.8	CELE_C14B9.8	C14B9.8a.1, C14B9.8b.1	N.A.	III -0.375938	C14B9.8 is orthologous to the human gene PHOSPHORYLASE KINASE, LIVER, ALPHA-2 SUBUNIT (PHKA2\; OMIM:306000), which when mutated leads to liver glycogenosis.
0.95	WBGene00017676	F21F3.7	F21F3.7	CELE_F21F3.7	F21F3.7.1	N.A.	I -0.592615	N.A.
0.95	WBGene00020094	wip-1	R144.4	CELE_R144.4	R144.4a.1, R144.4b.1	CEOP3256	III -2.228952	wip-1 encodes the C. elegans ortholog of WASP-interacting protein\; wip-1 is required for embryonic morphogenesis, specifically ventral enclosure\; WIP-1 is predicted to bind G-actin and in a yeast two-hybrid assay WIP-1 physically interacts with WSP-1, the C. elegans WASP ortholog\; WIP-1 and WSP-1 are mutually required for normal protein levels\; WIP-1 is broadly expressed in the embryo and is …
0.94	WBGene00001590	C45G3.3	C45G3.3	CELE_C45G3.3	C45G3.3.1	CEOP1986	I 3.669627	N.A.
0.94	WBGene00006504	kcc-1	R13A1.2	tag-158, CELE_R13A1.2	R13A1.2c.1, R13A1.2d.1, R13A1.2e.1, R13A1.2a.1, R13A1.2b.1	N.A.	IV 3.297671	N.A.
0.94	WBGene00007622	C16C10.1	C16C10.1	CELE_C16C10.1	C16C10.1.1	CEOP3160	III -3.710205	N.A.
0.94	WBGene00009552	piki-1	F39B1.1	CELE_F39B1.1	F39B1.1.1	N.A.	X 22.293131	piki-1 encodes a class II phosphatidylinositol 3-kinase (PI3K)\; piki-1 functions redundantly with vps-34 to regulate apoptotic cell clearance presumably through regulation of PtdIns(3)P levels.
0.94	WBGene00011481	imp-2	T05E11.5	CELE_T05E11.5	T05E11.5.1	N.A.	IV 4.885097	N.A.
0.93	WBGene00015327	snpn-1	C02B10.2	CELE_C02B10.2	C02B10.2.1	N.A.	IV 1.442480	N.A.
0.92	WBGene00003228	mex-1	W03C9.7	mel-21, CELE_W03C9.7	W03C9.7a.1, W03C9.7a.2, W03C9.7a.3, W03C9.7a.4, W03C9.7b.1, W03C9.7b.2, W03C9.7b.3	N.A.	II 5.150287	mex-1 encodes a CCCH-type zinc-finger protein that is required maternally for segregation of P granules, germ cell formation, and somatic cell differentiation in the early embryo\; MEX-1 is expressed cytoplasmically in germ line blastomeres, is a component of P granules, and is required for restricting PIE-1 expression and function to these cells\; mex-1 mRNA transcripts are also transiently asso…
0.92	WBGene00004282	rab-30	Y45F3A.2	CELE_Y45F3A.2	Y45F3A.2.1	CEOP3680	III 3.605403	rab-30 encodes a rab related protein of the Ras GTPase superfamily.
0.92	WBGene00006769	unc-33	Y37E11C.1	CELE_Y37E11C.1	Y37E11C.1a.1, Y37E11C.1a.2, Y37E11C.1b.1, Y37E11C.1c.1	CEOP4092	IV -3.304579	unc-33 encodes a conserved member of the CRMP\/TOAD\/Ulip\/DRP family of proteins that includes mammalian CRMP-2 (Collapsin response mediator protein-2), which is essential for axon guidance and axonogenesis\; in C. elegans, unc-33 activity is required for several biological processes including outgrowth and guidance of sensory, motor, and interneurons, sex myoblast migration, normal body movemen…
0.91	WBGene00002192	kin-4	C10C6.1	CELE_C10C6.1	C10C6.1d.1, C10C6.1h.1, C10C6.1g.1, C10C6.1c.1, C10C6.1e.1, C10C6.1f.1, C10C6.1i.1, C10C6.1a.1, C10C6.1b.1	N.A.	IV 4.980146	N.A.
0.91	WBGene00004775	2019-09-01	Y47G6A.12	stu-4, let-365, CELE_Y47G6A.12	Y47G6A.12.1, Y47G6A.12.2	N.A.	I -3.711686	sep-1 encodes the C. elegans ortholog of separase, a cysteine protease first discovered in yeast, as Esp1, that cleaves sister chromatids at their centromeres during anaphase by proteolyzing the Scc1 subunit of cohesin\; in mitotically dividing C. elegans embryos, SEP-1 activity is required for a number of cell cycle events including sister chromatid separation and membrane trafficking, specifica…
0.91	WBGene00006780	unc-44	B0350.2	CELE_B0350.2	B0350.2f.1, B0350.2f.2, B0350.2c.1, B0350.2c.2, B0350.2h.1, B0350.2h.2, B0350.2e.1, B0350.2e.2, B0350.2j.1, B0350.2i.1, B0350.2b.1, B0350.2d.1, B0350.2a.1	N.A.	IV 2.884653	N.A.
0.91	WBGene00006887	vav-1	C35B8.2	CELE_C35B8.2	C35B8.2a.1, C35B8.2a.2, C35B8.2b.1	N.A.	X 0.858443	vav-1 encodes a Rho\/Rac-family guanine nucleotide exchange factor orthologous to the Vav proto-oncogene\; VAV-1 is a complex protein with several domains, from N- to C-terminus: a calponin-like actin-binding domain\; a RhoGEF\/DH domain\; a pleckstrin-like domain\; a SH2 motif domain\; and an SH3 domain\; in C. elegans vav-1 is an essential gene and functions to regulate the concentration of int…
0.91	WBGene00009812	suca-1	F47B10.1	CELE_F47B10.1	F47B10.1.1	N.A.	X 2.680950	N.A.
0.91	WBGene00010307	skat-1	F59B2.2	CELE_F59B2.2	F59B2.2.1	CEOP3564	III 0.058404	N.A.
0.91	WBGene00012206	W02B12.11	W02B12.11	CELE_W02B12.11	W02B12.11.1, W02B12.11.2	N.A.	II 3.495745	N.A.
0.91	WBGene00018739	F53B1.8	F53B1.8	CELE_F53B1.8	F53B1.8b.1, F53B1.8a.1	N.A.	X -17.034719	N.A.
0.91	WBGene00019656	slc-25A10	K11G12.5	CELE_K11G12.5	K11G12.5.1, K11G12.5.2	CEOPX080	X -2.526320	N.A.
0.91	WBGene00044325	tag-321	C33H5.19	CELE_C33H5.19	C33H5.19.1	CEOP4252, CEOP4663	IV 3.476801	N.A.
0.9	WBGene00000419	ced-5	C02F4.1	CELE_C02F4.1	C02F4.1.1, C02F4.1.2	N.A.	IV 4.610670	ced-5 encodes a homolog of the human protein DOCK180\; ced-5 is required for the cell engulfment stage of programmed cell death, and physically interacts with CED-2.
0.89	WBGene00001638	gly-13	B0416.6	CELE_B0416.6	B0416.6.1	N.A.	X 0.997171	gly-13 encodes an experimentally verified UDP-N-acetylglucosamine alpha-3-D-mannoside beta-1,2-N-acetylglucosaminyltransferase I (GnT I), that is the primary GnT I enzyme in vivo, and that can act on unusual substrates\; gly-13 is expressed throughout development in many cell types\; a deletion allele of gly-13 is partially lethal with survivors displaying severe morphological and behavioral defe…
0.89	WBGene00016582	vps-8	C42C1.4	CELE_C42C1.4	C42C1.4b.1, C42C1.4a.1, C42C1.4c.1, C42C1.4d.1	CEOP4612	IV 5.830290	N.A.
0.89	WBGene00021854	Y54F10AR.1	Y54F10AR.1	CELE_Y54F10AR.1	Y54F10AR.1.1	CEOP3861	III -12.063140	N.A.
0.88	WBGene00001025	dnj-7	C55B6.2	CELE_C55B6.2	C55B6.2.1	CEOPX167	X -1.799856	dnj-7 encodes a protein containing a DnaJ domain that is orthologous to vertebrate P58IPK\/DNAJC3, peripheral membrane proteins of the rough endoplasmic reticulum (ER) that function in co-translocational ER protein degradation during ER stress\; in C. elegans, loss of dnj-7 activity via RNAi results in increased expression of an hsp-4::gfp (BiP) stress-inducible reporter fusion, suggesting that d…
0.88	WBGene00006794	unc-60	C38C3.5	unc-66, C38C3.f, C38C3.f, CELE_C38C3.5	C38C3.5.1	CEOP5600	V -18.876770	unc-60 encodes two, tissue-specific isoforms of actin depolymerizing factor(ADF)\/cofilin, actin-binding proteins that regulate actin filament dynamics\; one UNC-60 isoform, UNC-60A, primarily binds G-actin, depolymerizes actin filaments, and inhibits actin polymerization\; UNC-60A is essential during early embryonic development for polar body extrusion, cytokinesis, and embryonic patterning\; UN…
0.88	WBGene00008646	F10C2.5	F10C2.5	CELE_F10C2.5	F10C2.5.1	CEOP5316	V 3.615476	N.A.
0.88	WBGene00012983	men-1	Y48B6A.12	CELE_Y48B6A.12	Y48B6A.12.1, Y48B6A.12.2, Y48B6A.12.3	CEOP2700	II 22.882320	N.A.
0.86	WBGene00006923	vhp-1	F08B1.1	nrf-2, F09E5.f, F09E5.f, CELE_F08B1.1	F08B1.1c, F08B1.1e.1, F08B1.1e.2, F08B1.1a.1, F08B1.1a.2, F08B1.1a.3, F08B1.1d.1, F08B1.1d.2, F08B1.1b.1, F08B1.1b.2, F08B1.1f.1, F08B1.1f.2, F08B1.1f.3, F08B1.1g.1, F08B1.1g.2	N.A.	II -1.787894	vhp-1 encodes a MAP kinase phosphatase (MKP)\; VHP-1 activity is required for regulation of the KGB-1\/JNK-like MAPK-mediated stress response pathway.
0.84	WBGene00000548	clr-1	F56D1.4	F56D1.g, F56D1.g, CELE_F56D1.4	F56D1.4c, F56D1.4e.1, F56D1.4d.1, F56D1.4b.1, F56D1.4a.1	N.A.	II -1.306219	N.A.
0.84	WBGene00001680	gpb-2	F52A8.2	eat-11, gbp-2, CELE_F52A8.2	F52A8.2b, F52A8.2a.1	N.A.	I 1.910152	gpb-2 encodes an ortholog of Gbeta(5), that is dispensable for viability, but required for normal egg-laying, locomotion, and pharyngeal pumping\; GBP-2 may regulate the interaction between the GOA-1 and EGL-30 signaling pathways based on genetic analysis\; gpb-2 is expressed throughout development in the nervous system and in muscle, and expression is dependent upon expression of both EAT-16 and…
0.84	WBGene00021352	pcyt-2.1	Y37E3.11	CELE_Y37E3.11	Y37E3.11i.1, Y37E3.11a.1, Y37E3.11b.1, Y37E3.11c.1, Y37E3.11c.2, Y37E3.11d.1, Y37E3.11e.1, Y37E3.11e.2, Y37E3.11e.3, Y37E3.11e.4, Y37E3.11f.1, Y37E3.11f.2, Y37E3.11g.1, Y37E3.11g.2, Y37E3.11h.1	CEOP1036	I -11.873620	N.A.
0.83	WBGene00007058	dmd-6	F13G11.1	tag-193, CELE_F13G11.1	F13G11.1b.1, F13G11.1b.2, F13G11.1b.3, F13G11.1c.1, F13G11.1c.2, F13G11.1d.1	N.A.	IV 12.271160	N.A.
0.83	WBGene00021702	Y48G9A.9	Y48G9A.9	Y48G9A.f, Y48G9A.f, CELE_Y48G9A.9	Y48G9A.9a.1, Y48G9A.9b.1	N.A.	III -15.306410	N.A.
0.82	WBGene00000183	arf-3	F57H12.1	CELE_F57H12.1	F57H12.1.1	N.A.	IV 3.542103	arf-3 encodes a member of the ADP-ribosylation factor related protein family\; likely expressed in touch receptors and regulated by MEC-3.
0.82	WBGene00001648	goa-1	C26C6.2	unc-109, CELE_C26C6.2	C26C6.2.1	N.A.	I 2.098785	goa-1 encodes an ortholog of the heterotrimeric G protein alpha subunit Go (Go\/Gi class)\; GOA-1 activity is required for regulation of a number of behaviors, including locomotion, egg-laying, male mating, and olfactory-mediated behaviors\; GOA-1 activity is also required for asymmetric cell division in the early embryo\; goa-1 genetically interacts with the egl-30 pathway, and is expressed in a…
0.82	WBGene00006757	unc-18	F27D9.1	lan-2, unc-19, CELE_F27D9.1	F27D9.1b, F27D9.1a.1	N.A.	X -1.348420	unc-18 encodes the C. elegans ortholog of Saccharomyces cervisiae SEC1 and mammalian Munc18 proteins\; UNC-18 function as a chaperone for UNC-64\/syntaxin, ensuring its anterograde transport from the endoplasmic reticulum to the plasma membrane\; UNC-18 also enables the docking of vesicles to synaptic regions before vesicle priming and fusion, and promotes synaptic vesicle exocytosis\; UNC-18 may…
0.82	WBGene00009050	F22D6.2	F22D6.2	CELE_F22D6.2	F22D6.2.1	CEOP1364	I 1.709108	N.A.
0.82	WBGene00016117	C25H3.8	N.A.	N.A.	N.A.	N.A.	N.A.	N.A.
0.82	WBGene00017138	EEED8.10	EEED8.10	CELE_EEED8.10	EEED8.10b, EEED8.10a.1	CEOP2176	II -1.773526	This gene encodes a protein containing an F-box, a motif predicted to mediate protein-protein interactions either with homologs of yeast Skp-1p or with other proteins.
0.81	WBGene00015283	C01B10.9	C01B10.9	CELE_C01B10.9	C01B10.9.1	CEOP4188	IV 3.218046	N.A.
0.81	WBGene00015687	chdp-1	C10G11.7	CELE_C10G11.7	C10G11.7b, C10G11.7a.1, C10G11.7a.2, C10G11.7a.3	CEOP1320	I 0.897929	N.A.
0.81	WBGene00019304	K02D10.4	K02D10.4	CELE_K02D10.4	K02D10.4.1	N.A.	III -0.054166	N.A.
0.81	WBGene00022855	tcer-1	ZK1127.9	gos-1, CELE_ZK1127.9	ZK1127.9d.1, ZK1127.9d.2, ZK1127.9e.1, ZK1127.9e.2, ZK1127.9a.1, ZK1127.9c.1, ZK1127.9c.2, ZK1127.9c.3, ZK1127.9c.4, ZK1127.9c.5, ZK1127.9b.1	N.A.	II 0.349925	N.A.
0.8	WBGene00001499	fsn-1	C26E6.5	CELE_C26E6.5	C26E6.5.1	CEOP3244	III -2.337610	N.A.
0.8	WBGene00012934	gly-9	Y47D3A.23	tag-356, CELE_Y47D3A.23	Y47D3A.23a.1, Y47D3A.23b.1	CEOP3843	III 8.264279	N.A.
0.8	WBGene00022785	ZK652.6	ZK652.6	CELE_ZK652.6	ZK652.6b, ZK652.6a.1, ZK652.6c.1, ZK652.6d.1	N.A.	III -0.576186	N.A.
0.79	WBGene00000516	cki-1	T05A6.1	CELE_T05A6.1	T05A6.1.1	N.A.	II 0.566619	cki-1 encodes a homolog of the mammalian cyclin-dependent kinase inhibitor p27\/KIP1 that is required for the arrest of cell division in larval blast lineages, dauer larvae and starved L1 larvae\; excess CKI-1 expression prematurely stops cell division while cki-1(RNAi) induces extra cell divisions, indicating that CKI-1 quantitatively regulates the amount of mitosis in postembryonic worms.
0.79	WBGene00002074	ima-3	F32E10.4	CELE_F32E10.4	F32E10.4.1	N.A.	IV 3.356506	ima-3 encodes one of three C. elegans importin alpha nuclear transport factors and the importin alpha that is most similar to the alpha3-subtype\; ima-3 activity is required throughout development: during oogenesis, ima-3 is essential for progression past pachytene of meiotic prophase I and for proper organization of the nuclear pore complex (NPC) as well as association of P granules with the NPC…
0.79	WBGene00007860	rilp-1	C32A3.3	CELE_C32A3.3	C32A3.3a.1, C32A3.3a.2, C32A3.3a.3, C32A3.3b.1	N.A.	III -5.106321	N.A.
0.79	WBGene00015009	B0041.5	B0041.5	CELE_B0041.5	B0041.5c.1, B0041.5a.1	N.A.	I -1.034220	B0041.5 encodes a predicted transmembrane transporter that displays similarity to members of the F5 subfamily of solute carrier family 35 (SLC35F5) proteins that function as nucleotide sugar transporters\; loss of B0041.5 activity via RNAi results in decreased intestinal dipeptide uptake and a slight reduction in fat droplet diameter compared to control animals\; loss of B0041.5 activity has also…
0.78	WBGene00000872	cyk-1	F11H8.4	CELE_F11H8.4	F11H8.4b.1, F11H8.4a.1	N.A.	III -0.827588	cyk-1 encodes a Formin Homology protein homologous to Drosophila diaphanous and human DIAPH1\; cyk-1 is required for embryonic cytokinesis and Arp2\/3-independent assembly of cortical microfilaments\; CYK-1 physically interacts with the PFN-1 profilin\; CYK-1 is enriched within cleavage furrows during cell division.
0.78	WBGene00001649	gob-1	H13N06.3	CELE_H13N06.3	H13N06.3a.1, H13N06.3b.1	CEOPX136	X 22.719790	gob-1 encodes an experimentally confirmed trehalose-6-phosphatase, whichbelongs to the HAD-like hydrolase superfamily\; heat-shock induction oftransgenic ELT-2 causes ectopic expression of gob-1\; gob-1 first hasELT-2-dependent expression in the 8E cell stage of embryonic intestine,but later is expressed more widely\; gob-1 mutants are lethal as earlylarvae, at least partly because of their intes…
0.78	WBGene00007016	mdt-15	R12B2.5	CELE_R12B2.5	R12B2.5b.1, R12B2.5b.2, R12B2.5a.1, R12B2.5a.2	N.A.	III -1.439293	mdt-15 encodes, by alternative splicing, two isoforms of a Mediator subunit orthologous to human MED15\; together with NHR-49 and SBP-1, MDT-15 is required for normal fat accumulation, for expression of fatty acid (FA) desaturase genes (fat-5, fat-6, and fat-7), for normal levels of mono- and polyunsaturated FAs (PUFAs), and for viability, fecundity, mobility, and normally long lifespan\; several…
0.78	WBGene00008006	tag-325	C38D4.5	CELE_C38D4.5	C38D4.5a.1, C38D4.5b.1, C38D4.5c.1	CEOP3220	III -2.533327	N.A.
0.78	WBGene00012019	dkf-2	T25E12.4	CELE_T25E12.4	T25E12.4e.1, T25E12.4f.1, T25E12.4a.1, T25E12.4d.1, T25E12.4c.1, T25E12.4b.1	N.A.	V 11.164910	dkf-2 encodes one of two C. elegans novel protein kinase Ds\; dkf-2 activity is essential for regulation of innate immunity\; a dkf-2::gfp promoter fusion is expressed beginning in late embryogenesis and continuing through adulthood in the intestine and two cells in the vicinity of the posterior bulb of the pharynx.
0.78	WBGene00012740	slc-25A46	Y40B1B.8	CELE_Y40B1B.8	Y40B1B.8.1	N.A.	I 20.142570	N.A.
0.78	WBGene00018369	mig-39	F42H10.5	CELE_F42H10.5	F42H10.5a.1, F42H10.5a.2, F42H10.5b.1	N.A.	III -0.257167	N.A.
0.73	WBGene00004136	pqn-51	K11D12.2	CELE_K11D12.2	K11D12.2.1, K11D12.2.2, K11D12.2.3, K11D12.2.4	CEOP5564	V -3.570744	The protein product of this gene is predicted to contain a glutamine\/asparagine (Q\/N)-rich ('prion') domain, by the algorithm of Michelitsch and Weissman (as of the WS77 release of WormBase, i.e., in wormpep77).
0.73	WBGene00007757	C27A7.6	C27A7.6	CELE_C27A7.6	C27A7.6b, C27A7.6d.1, C27A7.6d.2, C27A7.6d.3, C27A7.6a.1, C27A7.6a.2, C27A7.6c.1	N.A.	V 3.666893	N.A.
0.69	WBGene00004110	pqn-20	C37A2.2	C37A2.c, C37A2.c, CELE_C37A2.2	C37A2.2.1	N.A.	I 1.322716	The protein product of this gene is predicted to contain a glutamine\/asparagine (Q\/N)-rich ('prion') domain, by the algorithm of Michelitsch and Weissman (as of the WS77 release of WormBase, i.e., in wormpep77).
0.69	WBGene00010052	F54D5.7	F54D5.7	CELE_F54D5.7	F54D5.7.1, F54D5.7.2	CEOP2560	II 3.754399	The F54D5.7 gene encodes an ortholog of the human gene GLUTARYL-COENZYME A DEHYDROGENASE (GCDH), which when mutated leads to glutaricaciduria type I (OMIM:231670).
0.69	WBGene00011528	fndc-1	T06D8.7	CELE_T06D8.7	T06D8.7.1	CEOP2524	II 3.370810	N.A.
0.66	WBGene00006755	unc-16	ZK1098.10	egl-39, CELE_ZK1098.10	ZK1098.10h.1, ZK1098.10i.1, ZK1098.10m.1, ZK1098.10e.1, ZK1098.10l.1, ZK1098.10b.1, ZK1098.10n.1, ZK1098.10d.1, ZK1098.10a.1, ZK1098.10j.1, ZK1098.10f.1, ZK1098.10k.1, ZK1098.10o.1, ZK1098.10g.1, ZK1098.10p.1, ZK1098.10p.2, ZK1098.10p.3, ZK1098.10p.4, ZK1098.10c.1, ZK1098.10c.2	CEOP3830	III 0.586110	unc-16 encodes a homolog of murine JIP3 (c-Jun N-terminal kinase (JNK)-interacting protein 3) and Drosophila SUNDAY DRIVER\; unc-16 is involved in vesicle transport and mutations affect egg laying, locomotion, and defecation\; UNC-16 physically interacts with JNK and JNK kinases, with the KLC-2 kinesin light chain, and the DLI-1 dynein light intermediate chain\; UNC-16 is expressed in neurons of …
0.66	WBGene00013302	vti-1	Y57G11C.4	CELE_Y57G11C.4	Y57G11C.4.1	CEOP4651	IV 12.439270	N.A.
0.65	WBGene00020184	uba-5	T03F1.1	CELE_T03F1.1	T03F1.1.1, T03F1.1.2	N.A.	I -1.953660	N.A.
0.64	WBGene00001443	fli-1	B0523.5	ach-1, CELE_B0523.5	B0523.5.1	CEOP3876	III -0.102994	fli-1 encodes a protein with an N-terminal amphipathic leucine-rich region and gelsolin repeats that is orthologous to Drosophila and human Flightless I\; FLI-1 can interact with human Ha-Ras and human actin in vitro\; fli-1 mRNA levels are highest in embryos.
0.63	WBGene00006833	unc-108	F53F10.4	rab-2, unc-67, CELE_F53F10.4	F53F10.4b.1, F53F10.4a.1, F53F10.4c.1, F53F10.4d.1, F53F10.4d.2	CEOP1116	I -2.007928	unc-108 encodes a small GTPase homologous to the Rab GTPases that function in endocytosis, membrane fusion, and vesicular trafficking events\; unc-108 function is required in neurons for normal locomotion\; unc-108 also functions in the removal of apoptotic cells, specifically it functions in engulfing cells for the recruitment and fusion of the lysosome to the phagosome\; unc-108 is expressed in…
0.63	WBGene00044025	T01G1.4	T01G1.4	CELE_T01G1.4	T01G1.4.1	CEOP4639	IV 4.962935	N.A.
0.6	WBGene00004279	rab-21	T01B7.3	CELE_T01B7.3	T01B7.3.1	CEOP2388	II 0.859375	rab-21 encodes a Rab GTPase most closely related to the Drosophila and vertebrate Rab21 GTPases and Saccharomyces cerevisiae VPS21\; by homology, RAB-21 is predicted to be involved in membrane trafficking\/vesicle transport\; loss of rab-21 activity via RNAi results in 7-8\% embryonic lethality.
0.6	WBGene00019209	emc-1	H17B01.4	CELE_H17B01.4	H17B01.4b.1, H17B01.4a.1	N.A.	II -15.434200	N.A.
0.58	WBGene00004881	smg-3	Y73B6BL.18	mab-13, CELE_Y73B6BL.18	Y73B6BL.18a.1, Y73B6BL.18a.2, Y73B6BL.18a.3, Y73B6BL.18a.4, Y73B6BL.18b.1, Y73B6BL.18b.2, Y73B6BL.18b.3, Y73B6BL.18b.4	CEOP4649	IV 3.171083	N.A.
0.58	WBGene00018076	pifk-1	F35H12.4	CELE_F35H12.4	F35H12.4.1	N.A.	X -18.926100	N.A.
0.56	WBGene00000223	atf-7	C07G2.2	CELE_C07G2.2	C07G2.2d.1, C07G2.2a.1, C07G2.2c.1, C07G2.2c.2, C07G2.2b.1	CEOP3192	III -3.150415	atf-7 encodes a basic-region leucine zipper (bZIP) transcription factor orthologous to members of the ATF2\/ATF7\/CREB5 family of cyclic AMPresponse element binding (CREB)\/activating transcription factors (ATFs)\; ATF-7 plays a key role in the innate immune response by regulating the expression of immune genes downstream of PMK-1\/p38 MAPK\; ATF-7 is likely converted from a transcriptional repre…
0.56	WBGene00000871	cye-1	C37A2.4	evl-10, let-605, CELE_C37A2.4	C37A2.4b.1, C37A2.4a.1	N.A.	I 1.317093	cye-1 encodes the sole C. elegans E-type cyclin\; CYE-1 is required for progression through the mitotic cell cycle during embryonic, larval, and germline development\; cye-1 is also required for endoreduplication in intestinal cells\; CYE-1 is expressed ubiquitously in nuclei during embryonic development and postembryonically in proliferating blast cells, including germline stem cells\; in the ge…
0.56	WBGene00002992	lin-3	F36H1.4	let-94, sli-4, sli-4, CELE_F36H1.4	F36H1.4f.1, F36H1.4f.2, F36H1.4b.1, F36H1.4b.2, F36H1.4g.1, F36H1.4c.1, F36H1.4a.1, F36H1.4d.1, F36H1.4d.2, F36H1.4h.1, F36H1.4h.2, F36H1.4e.1	N.A.	IV 4.820274	lin-3 encodes a member of the EGF family of peptide growth factors that affects induction of vulval development, viability, ovulation, behavioral quiescence after stress, and male spicule development\; it acts genetically upstream of its presumptive receptor let-23, and is expressed in multiple locations consistent with it acting as a localized ligand\; for example, the anchor cell of the develop…
0.56	WBGene00006788	unc-53	F45E10.1	CELE_F45E10.1	F45E10.1e.1, F45E10.1f.1, F45E10.1a.1, F45E10.1b.1, F45E10.1g.1, F45E10.1c.1, F45E10.1h.1, F45E10.1d.1	N.A.	II 3.165681	unc-53 encodes at least five large (~1200-1600 residue) proteins, orthologous to human NAV1, NAV2\/RAINB1 (OMIM:607026), and NAV3, and homologous to Drosophila CG10662\; UNC-53 proteins are required for anteroposterior guidance of migrating cells, axons, and excretory cell canals\; unc-53 mutations affect egg laying, backward locomotion, body size, and male mating\; UNC-53 proteins vary in their …
0.56	WBGene00008775	mogs-1	F13H10.4	agl-1, CELE_F13H10.4	F13H10.4a.1, F13H10.4c.1, F13H10.4b.1	CEOP4400	IV 4.782130	mogs-1 encodes a mannosyl-oligosaccharide glucosidase (E.C. 3.2.1.106) orthologous to the human gene A-GLUCOSIDASE I (GCS1\; OMIM:601336), which when mutated leads to disease.
0.56	WBGene00010130	vha-14	F55H2.2	CELE_F55H2.2	F55H2.2.1, F55H2.2.2, F55H2.2.3	CEOP3880	III 0.574798	vha-14 encodes an ortholog of subunit D of the cytoplasmic (V1) domainof vacuolar proton-translocating ATPase (V-ATPase)\; VHA-14 is apredicted cytosolic rotor (stalk) component.
0.56	WBGene00016610	paqr-1	C43G2.1	CELE_C43G2.1	C43G2.1b.1, C43G2.1c.1, C43G2.1c.2, C43G2.1a.1, C43G2.1a.2, C43G2.1a.3	N.A.	IV 3.204714	N.A.
0.54	WBGene00001080	dpy-21	Y59A8B.1	Y59A8B.c, Y59A8B.c, CELE_Y59A8B.1	Y59A8B.1b, Y59A8B.1a.1	CEOP5552	V 13.332290	dpy-21 encodes a novel, conserved protein with a proline-rich N terminus\; dpy-21 affects RNA levels of X-linked dosage-compensated genes, body length in hermaphrodites, and fertility and male tail development in males\; DPY-21 interacts in vivo with DPY-27 and SDC-3, members of the dosage compensation complex, and like members of the dosage compensation complex, is diffusely localized in nuclei …
0.53	WBGene00006808	unc-76	C01G10.11	CELE_C01G10.11	C01G10.11a.1, C01G10.11a.2, C01G10.11b.1, C01G10.11b.2, C01G10.11f.1, C01G10.11f.2, C01G10.11c.1, C01G10.11d.1, C01G10.11e.1	N.A.	V 7.320519	unc-76 encodes a predicted coiled-coil protein that belongs to the FEZ (fasciculation and elongation protein\; zygin\/zeta-1) family of proteins\; UNC-76 activity is required for normal axonal outgrowth and fasciculation and hence, normal locomotion\; UNC-76 expression begins during embryogenesis and is present in all axons throughout development\; UNC-76 localizes to both axons and cell bodies.
0.53	WBGene00017293	bmy-1	F09E5.17	CELE_F09E5.17	F09E5.17.1	CEOP2168	II -1.787300	N.A.
0.48	WBGene00010113	F55D12.5	F55D12.5	CELE_F55D12.5	F55D12.5b.1, F55D12.5a.1	CEOP1432, CEOP5603	I 2.393169	N.A.
0.43	WBGene00018294	atg-18	F41E6.13	tag-283, atgr-18, CELE_F41E6.13	F41E6.13b.1, F41E6.13a.1	N.A.	V 1.503262	atg-18 encodes, by alternative splicing, two isoforms of a WD40 repeat-containing protein orthologous to the autophagic budding yeast protein Atg18p, and to human WIPI1 (OMIM:609224) and WIPI2 (OMIM:609225)\; ATG-18 activity is essential for normal dauer morphogenesis and autophagy in daf-2 mutant animals\; ATG-18 is expressed in larval and adult pharynx, bodywall muscle, hypodermis, seam cells, …
0.42	WBGene00003060	lpd-3	Y47G6A.23	CELE_Y47G6A.23	Y47G6A.23d.1, Y47G6A.23b.1, Y47G6A.23c.1, Y47G6A.23a.1	CEOP1914	I -3.170879	lpd-3 encodes a novel protein that is nevertheless conserved amongst humans, mice, and Drosophila\; in C. elegans, LPD-3 activity is required for normal lipid metabolism, as animals that have reduced lpd-3 activity as a result of RNA-mediated gene interference (RNAi) lack lipid storage granules in the intestine and are paler and skinnier than wild-type animals\; lpd-3 is expressed prominently in …
0.37	WBGene00001134	eat-3	D2013.5	mgm-1, CELE_D2013.5	D2013.5.1	CEOP2424	II 1.266246	eat-3 encodes a mitochondrial dynamin family member, closely related to bacterial dynamin-like proteins, that is orthologous to human Opa1 (OMIM:203740, mutated in autosomal dominant optic atrophy) and budding yeast Mgm1\; eat-3 is required for proper regulation of inner mitochondrial membrane fusion and normal mitochondrial function (oxidative phosphorylation)\; accordingly, eat-3 is also requir…
0.35	WBGene00003231	mex-6	AH6.5	CELE_AH6.5	AH6.5.1	N.A.	II 1.498491	mex-6 encodes a CCCH zinc-finger protein highly similar to MEX-5 that functions with MEX-5 to affect embryonic viability, establish soma germline asymmetry in embryos and establish PIE-1, MEX-1, and POS-1 asymmetry in embryos, and also affects formation of intestinal cells\; MEX-6 and MEX-5 may act downstream of the PAR proteins.
0.35	WBGene00003656	nhr-66	T09A12.4	CELE_T09A12.4	T09A12.4j.1, T09A12.4d.1, T09A12.4f.1, T09A12.4i.1, T09A12.4i.2, T09A12.4e.1, T09A12.4c.1, T09A12.4h.1, T09A12.4b.1, T09A12.4a.1, T09A12.4a.2, T09A12.4a.3, T09A12.4g.1, T09A12.4g.2	N.A.	IV 3.694661	nhr-66 encodes a member of the superfamily of nuclear receptors, which is one of the most abundant class of transcriptional regulators\; nuclear receptors have a well conserved DNA binding domain and a less conserved C-terminal ligand binding domain\; expression studies using GFP fusions indicate that nhr-66 is expressed in several neuronal and nonneuronal cells\; microarray analysis indicates th…
0.35	WBGene00003901	paa-1	F48E8.5	CELE_F48E8.5	F48E8.5.1, F48E8.5.2	CEOP3304	III -1.659713	paa-1 encodes the sole C. elegans homolog of PR65, the structural subunit of protein phosphatase 2A (PP2A)\; paa-1 is an essential gene, required in RNAi assays for embryonic viability, fertility, and cuticular integrity\; PAA-1 protein physically interacts with LET-92, the PP2A catalytic subunit, and with RSA-1, a PP2A regulatory subunit\; PAA-1 also physically interacts with SMG-5\; PAA-1 local…
0.34	WBGene00014109	chpf-1	ZK856.8	CELE_ZK856.8	ZK856.8.1	CEOP5248	V 2.328816	N.A.
0.34	WBGene00014151	vps-15	ZK930.1	CELE_ZK930.1	ZK930.1b.1, ZK930.1a.1	N.A.	II 4.136450	N.A.
0.29	WBGene00000874	cyk-3	ZK328.1	uch-1, CELE_ZK328.1	ZK328.1a.1, ZK328.1b.1	N.A.	III -1.426360	cyk-3 encodes a functional ubiquitin C-terminal hydrolase required for embryonic viability and for cellular osmotic regulation\; osmotic regulation defects in mutants contribute at least partially to cytokinesis defects in mutant embryos.
0.28	WBGene00007923	C34C12.4	C34C12.4	CELE_C34C12.4	C34C12.4.1, C34C12.4.2	N.A.	III -6.668597	N.A.
0.28	WBGene00017066	maco-1	D2092.5	CELE_D2092.5	D2092.5.1	N.A.	I 1.237554	maco-1 encodes a novel protein with five transmembrane domains in the N-terminus and four coiled coil domains in the C-terminus\; maco-1 is functionally conserved across species and is orthologous to human macoilin (OMIM:601301)\; macoilin is involved in assembly or traffic of ion channels or ion channel regulators\; MACO-1 is not required for development but for appropriate regulation of neurona…
0.28	WBGene00019807	jamp-1	R01B10.5	5G528, CELE_R01B10.5	R01B10.5.1	CEOP5100	V -0.388851	jamp-1 encodes the ortholog of the endoplasmic reticulum (ER) stress-inducible JNK-associated membrane protein (JAMP)\; jamp-1 is involved in the clearance of misfolded proteins, most likely by facilitating the localization of proteasomes at the ER and promoting their activity\; JAMP-1 localizes to the endoplasmic reticulum and associates with components of the proteasome and endoplasmic reticulu…
0.26	WBGene00016258	vha-16	C30F8.2	C30F8.a, C30F8.a, C30F8.b, C30F8.b, CELE_C30F8.2	C30F8.2.1, C30F8.2.2, C30F8.2.3	N.A.	I -0.420420	vha-16 encodes an an ortholog of subunit d of the membrane-bound (V0)domain of vacuolar proton-translocating ATPase (V-ATPase)\; VHA-16 ispredicted to mechanically anchor the V-ATPase cytosolic rotor (stalk) tothe membrane, while also providing a hub for the V-ATPase transmembranerotor\; vha-16 is expressed in diverse tissues (e.g., excretory cell,pharynx, intestine, hypodermis, and neurons).
0.25	WBGene00011815	bath-43	T16H12.5	CELE_T16H12.5	T16H12.5b.1, T16H12.5a.1	CEOP3652	III 1.817017	The T16H12.5 gene encodes a protein with a meprin-associated Traf homology (MATH) domain that may be involved in apoptosis.
0.24	WBGene00003598	nhl-2	F26F4.7	CELE_F26F4.7	F26F4.7.1	CEOP3232	III -2.406675	nhl-2 encodes one of five C. elegans proteins that contain TRIM (tripartite-containing motif\; RING, B-box, coiled-coil) and NHL (NCL-1, HT2A and LIN-41) domains\; NHL-2 functions together with CGH-1 and in association with the miRSC complex to regulate the efficacy of microRNA-target interactions and hence, gene regulation, during postembryonic development\; in addition, nhl-2 mutations suppress…
0.23	WBGene00000479	cgh-1	C07H6.5	CELE_C07H6.5	C07H6.5.1	N.A.	III -0.727171	cgh-1 encodes a putative DEAD-box RNA helicase, orthologous tobudding yeast Dhh1p, fission yeast Ste13p, Drosophila ME31B, andhuman DDX6 (OMIM:600326)\; CGH-1 inhibits physiological apoptosis inoocytes, keeping it down to a normal level of ~50\% in hermaphroditegonads\; independently of apoptosis, CGH-1 is also required for spermfunction, oocyte fertilization, and early embryonic cytokinesis\; by…
0.23	WBGene00004132	ifet-1	F56F3.1	pqn-45, spn-2, CELE_F56F3.1	F56F3.1.1	N.A.	III -3.168350	N.A.
0.23	WBGene00006861	cal-5	C24H10.5	uvt-2, CELE_C24H10.5	C24H10.5.1	N.A.	X -6.196420	uvt-2 encodes a protein that contains four EF-hand calcium binding motifs with similarity to human calmodulin\; mRNA weakly expressed in L1 through L4 larval stages and in the adult hermaphrodite.
0.23	WBGene00011661	ztf-27	T09F3.1	CELE_T09F3.1	T09F3.1.1	N.A.	II 2.542255	N.A.
0.22	WBGene00007696	tram-1	C24F3.1	CELE_C24F3.1	C24F3.1b.1, C24F3.1a.1	CEOP4364	IV 4.561370	tram-1 encodes the C. elegans ortholog of translocating chain-associated membrane protein 1\; by homology, TRAM-1 is predicted to function in translocation of protein across the endoplasmic reticulum membrane\; TRAM-1 localizes to the rough endoplasmic reticulum (ER) as well as to post-ER compartments such as the ciliary base.
0.22	WBGene00011044	R05H10.3	R05H10.3	CELE_R05H10.3	R05H10.3a.1, R05H10.3b.1	CEOP2652	II 23.670429	N.A.
0.21	WBGene00002981	lgg-2	ZK593.6	atg-8.2, CELE_ZK593.6	ZK593.6b.1, ZK593.6b.2, ZK593.6a.1, ZK593.6a.2	N.A.	IV 4.755509	lgg-2 encodes an ortholog of the autophagic budding yeast protein Atg8p\;LGG-2 is also homologous the light chain 3 (LC3) subunit of themicrotubule-associated proteins 1A and 1B (MAP1A and MAP1B)\; LGG-2 is predicted to associate with MAP1A and MAP1B and with microtubules and toperhaps play a role in regulating the microtubule-binding activity ofMAP1A and MAP1B\; LGG-2 has no obvious function in …
0.21	WBGene00009587	mig-38	F40F11.2	CELE_F40F11.2	F40F11.2.1	N.A.	IV 5.025928	N.A.
0.21	WBGene00010579	K05C4.2	K05C4.2	CELE_K05C4.2	K05C4.2.1, K05C4.2.2	CEOP1752	I 26.474020	N.A.
0.2	WBGene00010075	F55A11.1	F55A11.1	CELE_F55A11.1	F55A11.1.1	N.A.	V 3.329515	N.A.
0.2	WBGene00013462	micu-1	Y67H2A.4	CELE_Y67H2A.4	Y67H2A.4c.1, Y67H2A.4d.1	CEOP4538	IV 8.516169	N.A.
0.19	WBGene00002072	ima-1	T19B10.7	CELE_T19B10.7	T19B10.7.1, T19B10.7.2	CEOP5280	V 2.992475	ima-1 encodes a member of the importin family.
0.18	WBGene00015268	BE0003N10.3	BE0003N10.3	CELE_BE0003N10.3	BE0003N10.3a.1, BE0003N10.3b.1	N.A.	III -24.780729	N.A.
0.17	WBGene00000175	aqp-7	M02F4.8	CELE_M02F4.8	M02F4.8.1, M02F4.8.2	N.A.	X -12.652430	aqp-7 encodes an aquaglyceroporin whose expression in Xenopus oocytes increases either water or glycerol permeability five- to seven-fold\; AQP-7 has no function in mass RNAi assays, perhaps reflecting genetic redundancy with its several paralogs\; AQP-7 is expressed in muscle punctae (perhaps focal adhesions).
0.17	WBGene00006702	ubc-3	Y71G12B.15	CELE_Y71G12B.15	Y71G12B.15a.1, Y71G12B.15a.2, Y71G12B.15b.1	N.A.	I -13.372740	ubc-3 encodes an E2 ubiquitin-conjugating enzyme orthologous to Saccharomyces cerevisiae and human CDC34 (OMIM:603731) which are involved in regulating protein stability during G1 and G2 cell cycle phase transitions\; by homology, UBC-3 is likely required for covalent attachment of ubiquitin to select target proteins to facilitate their degradation\; however, as loss of UBC-3 activity via RNA-med…
0.17	WBGene00008748	yap-1	F13E6.4	CELE_F13E6.4	F13E6.4.1	N.A.	X 2.372910	yap-1 encodes a protein with sequence similarity to YAP (yes-associated protein) in its N-terminal TEAD-binding domain and WW domain\; YAP-1 plays a role in the response to heat and in determination of adult life span\; YAP-1 physically interacts with EGL-44, a transcription enhancer factor of the TEA domain (TEAD) class, and when co-expressed, the two proteins are able to activate a TEAD reporte…
0.16	WBGene00020510	T14G11.1	T14G11.1	CELE_T14G11.1	T14G11.1.1, T14G11.1.2	N.A.	X -13.891170	N.A.
0.15	WBGene00000192	arl-8	Y57G11C.13	CELE_Y57G11C.13	Y57G11C.13.1	CEOP4628	IV 12.514090	arl-8 encodes an Arf-like small GTPase and is highly conserved among multicellular organisms\; arl-8 regulates transport of axonal presynaptic vesicle protein cargo, most likely by preventing vesicle aggregation\; arl-8 is involved in endosome to lysosome transport, by promoting late endosome-lysosome fusion\; arl-8 is also required for proper embryonic development\; arl-8 associates with synapti…
0.15	WBGene00004274	rab-11.1	F53G12.1	rab-11, CELE_F53G12.1	F53G12.1.1, F53G12.1.2	CEOP1957	I -19.840330	rab-11.1 encodes a small GTPase homologous to the Rab GTPases that function in endocytosis, membrane fusion, and vesicular trafficking events\; RAB-11.1 activity is required for completion of the final stages of cytokinesis during early embryogenesis and for efficient uptake of yolk proteins during oocyte development\; RAB-11.1 is also required for normal peripheral localization of nuclei in the …
0.15	WBGene00009307	F32A11.1	F32A11.1	CELE_F32A11.1	F32A11.1.1, F32A11.1.2	N.A.	II 14.724880	N.A.
0.15	WBGene00015940	zipt-3	C18A3.2	CELE_C18A3.2	C18A3.2.1, C18A3.2.2	CEOP2216	II -0.961285	N.A.
0.15	WBGene00016961	vps-32.1	C56C10.3	phi-27, tag-309, CELE_C56C10.3	C56C10.3.1, C56C10.3.2	N.A.	II -0.103925	N.A.
0.15	WBGene00020246	clic-1	T05B11.3	clc-1, CELE_T05B11.3	T05B11.3.1	CEOP5584	V 0.856302	N.A.
0.14	WBGene00008364	slc-25A26	D1046.3	CELE_D1046.3	D1046.3.1	CEOP4316	IV 3.999797	N.A.
0.14	WBGene00021844	sec-11	Y54E10BR.5	Y54E10BR.d, Y54E10BR.d, CELE_Y54E10BR.5	Y54E10BR.5.1	CEOP1924	I -4.711240	N.A.
0.12	WBGene00003068	lrk-1	T27C10.6	LRRK2, CELE_T27C10.6	T27C10.6.1	N.A.	I 5.692690	lrk-1 encodes the sole C. elegans homolog of the leucine-rich repeat kinases, LRRK1 and the familial Parkinsonism gene PARK8\/LRRK2\; in C. elegans, lrk-1 is required for polarized localization of synaptic vesicle proteins to presynaptic regions\; LRK-1 functions antagonistically to PINK-1 to regulate oxidative and endoplasmic reticulum stress response as well as neurite outgrowth\; LRK-1 is wide…
0.12	WBGene00003592	nfi-1	ZK1290.4	gei-21, CELE_ZK1290.4	ZK1290.4c.1, ZK1290.4a.1, ZK1290.4b.1	N.A.	II 0.504048	nfi-1 encodes the C. elegans ortholog of the Nuclear Factor I (NFI) family of transcription factors\; in C. elegans, nfi-1 activity is required for locomotion, egg laying, pharyngeal pumping, and wild-type adult lifespan\; in vitro, NFI-1 can bind conserved NFI-binding sites also recognized by vertebrate NFI proteins\; in situ hybridization experiments indicate that nfi-1 is expressed maternally …
0.12	WBGene00004032	pkc-1	F57F5.5	kin-13, ttx-4, CELE_F57F5.5	F57F5.5c.1, F57F5.5a.1, F57F5.5b.1	CEOP5312	V 3.593185	pkc-1 encodes a serine\/threonine protein kinase that is orthologous to mammalian protein kinase C epsilon (PRKCE), a member of the nPKC subgroup of the protein kinase C superfamily\; together with UNC-13, PKC-1 may act downstream of goa-1 to modulate phorbol ester-induced stimulation of acetylcholine release at NMJs\; PKC-1 positively regulates locomotion, and affects thermotaxis and chemotaxis …
0.11	WBGene00006543	tbx-2	F21H11.3	sdf-13, mab-22, CELE_F21H11.3	F21H11.3.1, F21H11.3.2	N.A.	III -2.089744	tbx-2 encodes one of 21 C. elegans T-box transcription factors\; during development, tbx-2 activity is required for normal adaptation, but not chemotaxis, to attractive odorants sensed by the AWC amphid neurons\; tbx-2 is required redundantly with unc-3 and unc-31 for negative regulation of dauer formation, and large-scale RNAi screens reveal an essential role for tbx-2 in early larval developmen…
Table S1. Computationally predicted genes >0.1 PcT (Probability of Conserved Targets, Friedman et al., 2008) cross referenced with germline expressed genes (Tzur et al., 2018).
