# Supplementary material
Source: publisher figshare collection journal article supplement (https://gsajournals.figshare.com/articles/dataset/_/13103411)
Supplement: Supplementary file 2 [file 1]

**A**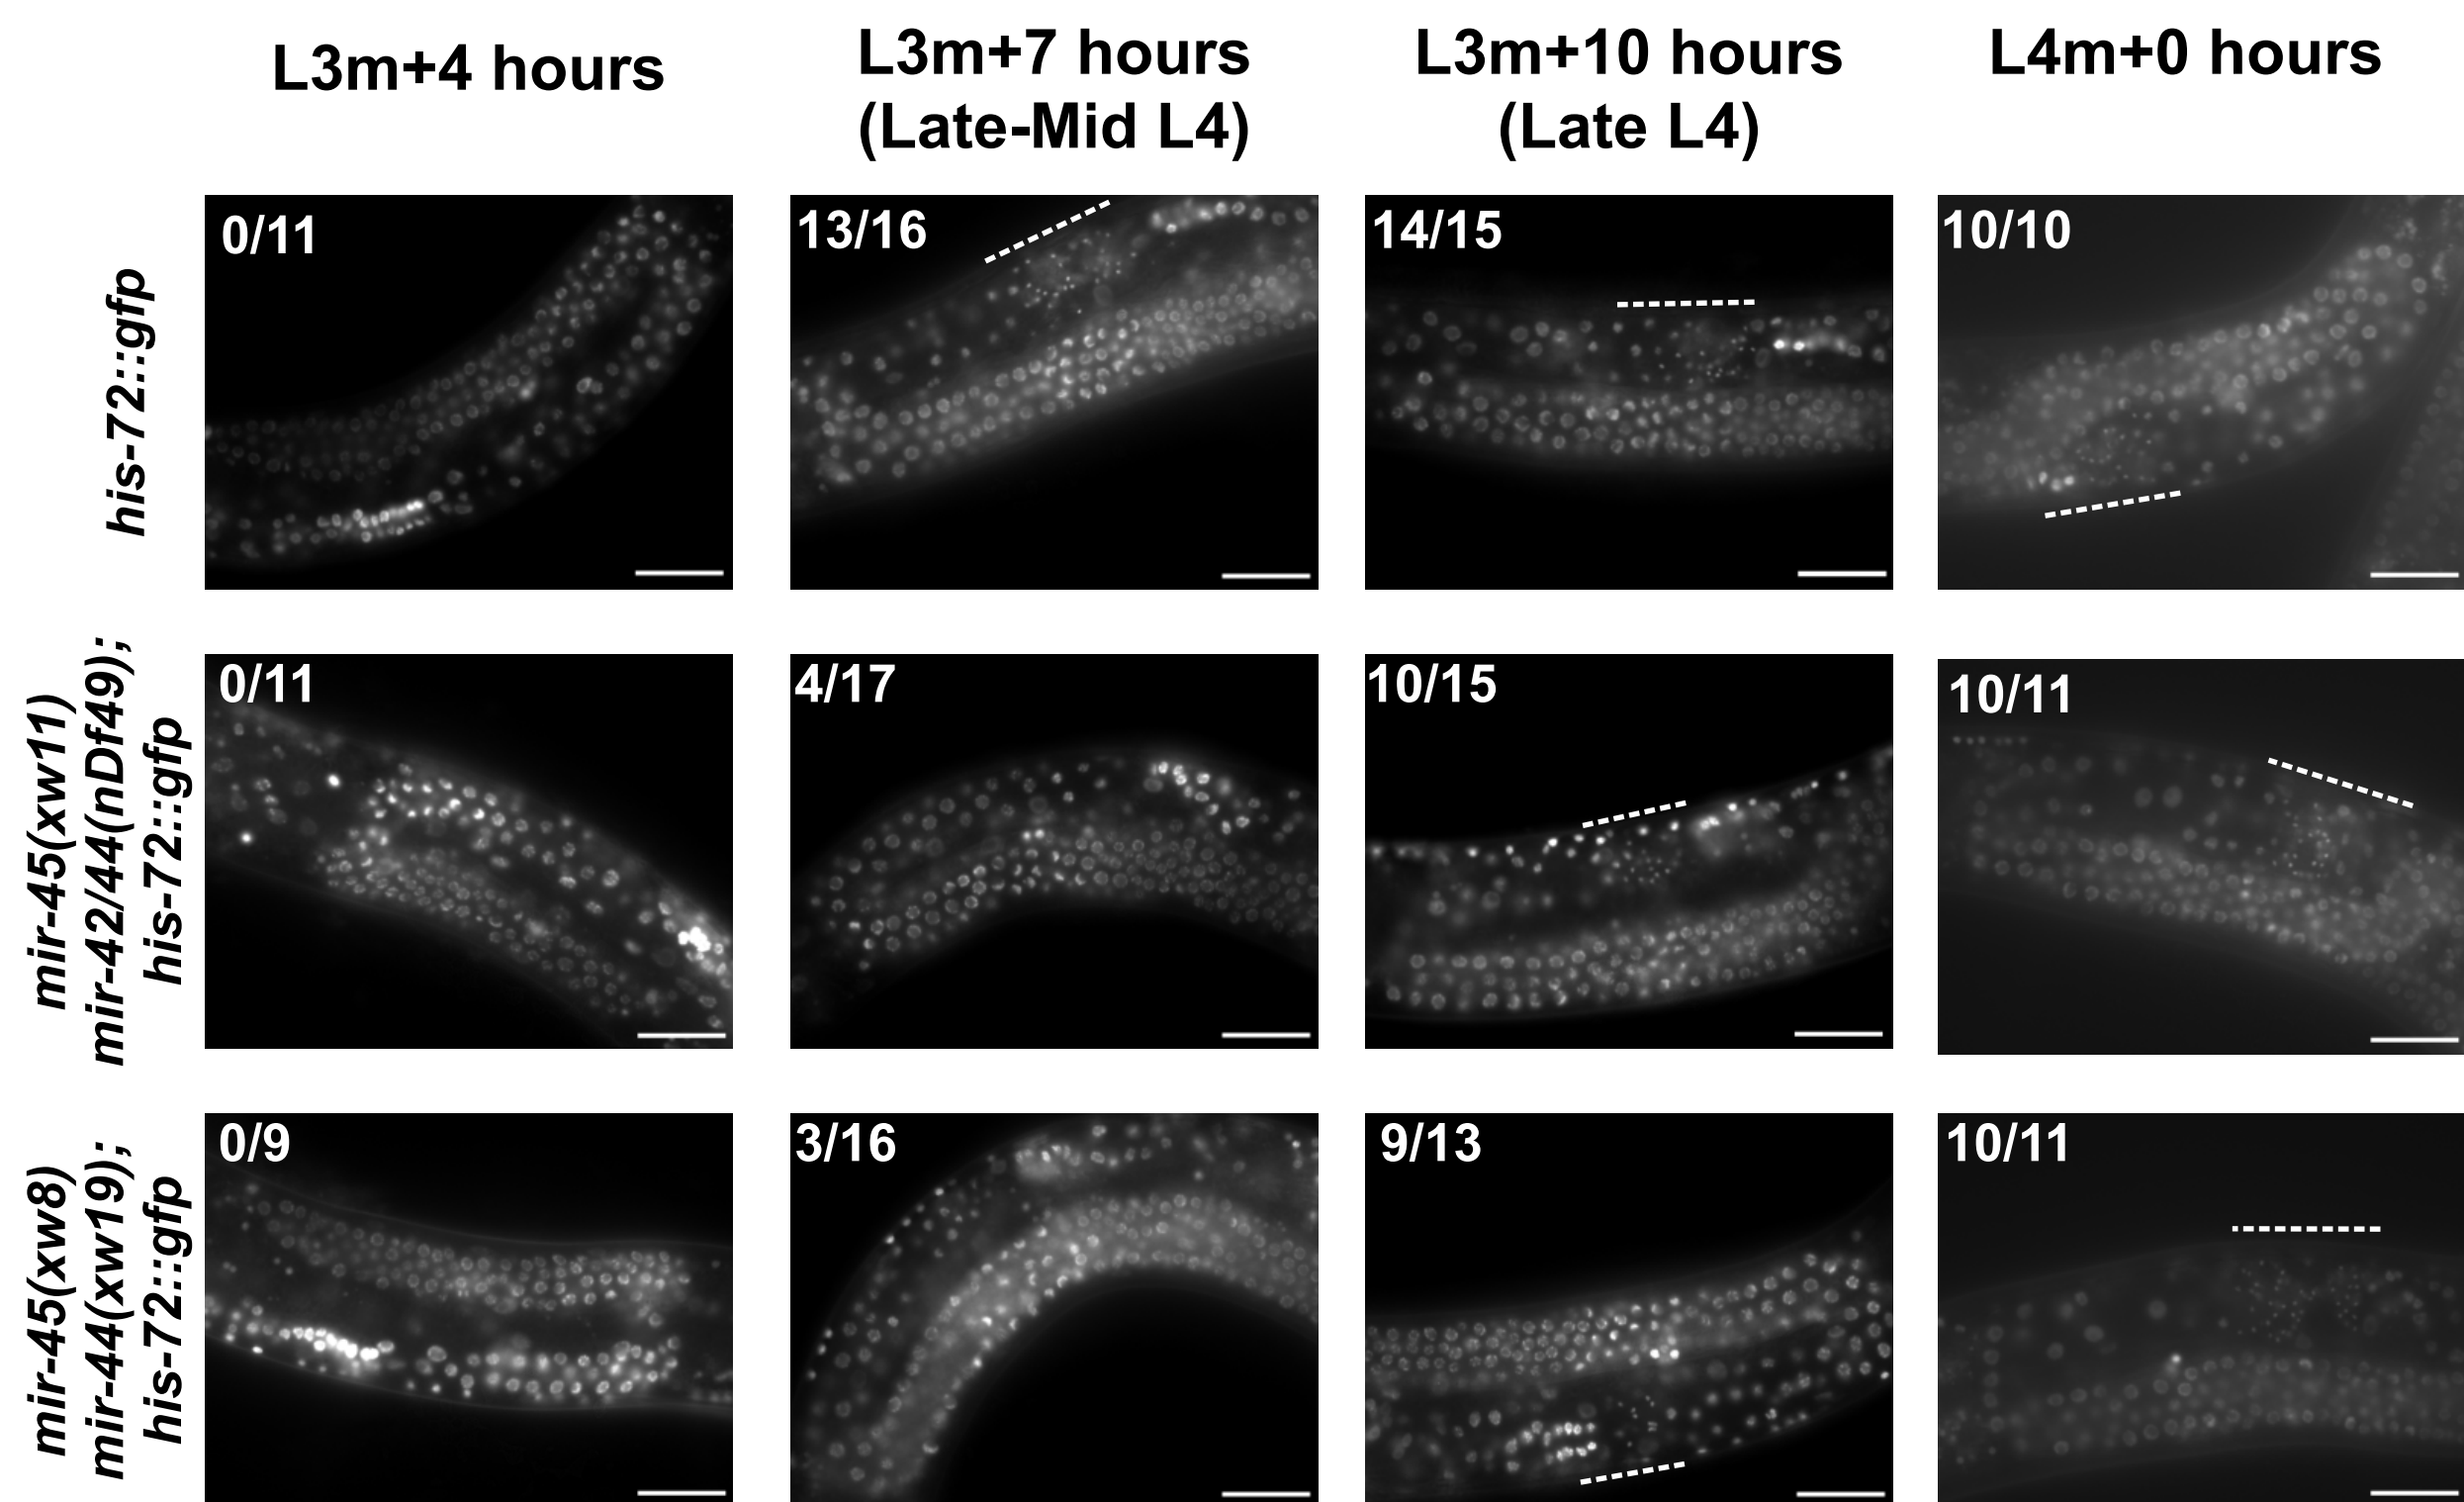**B**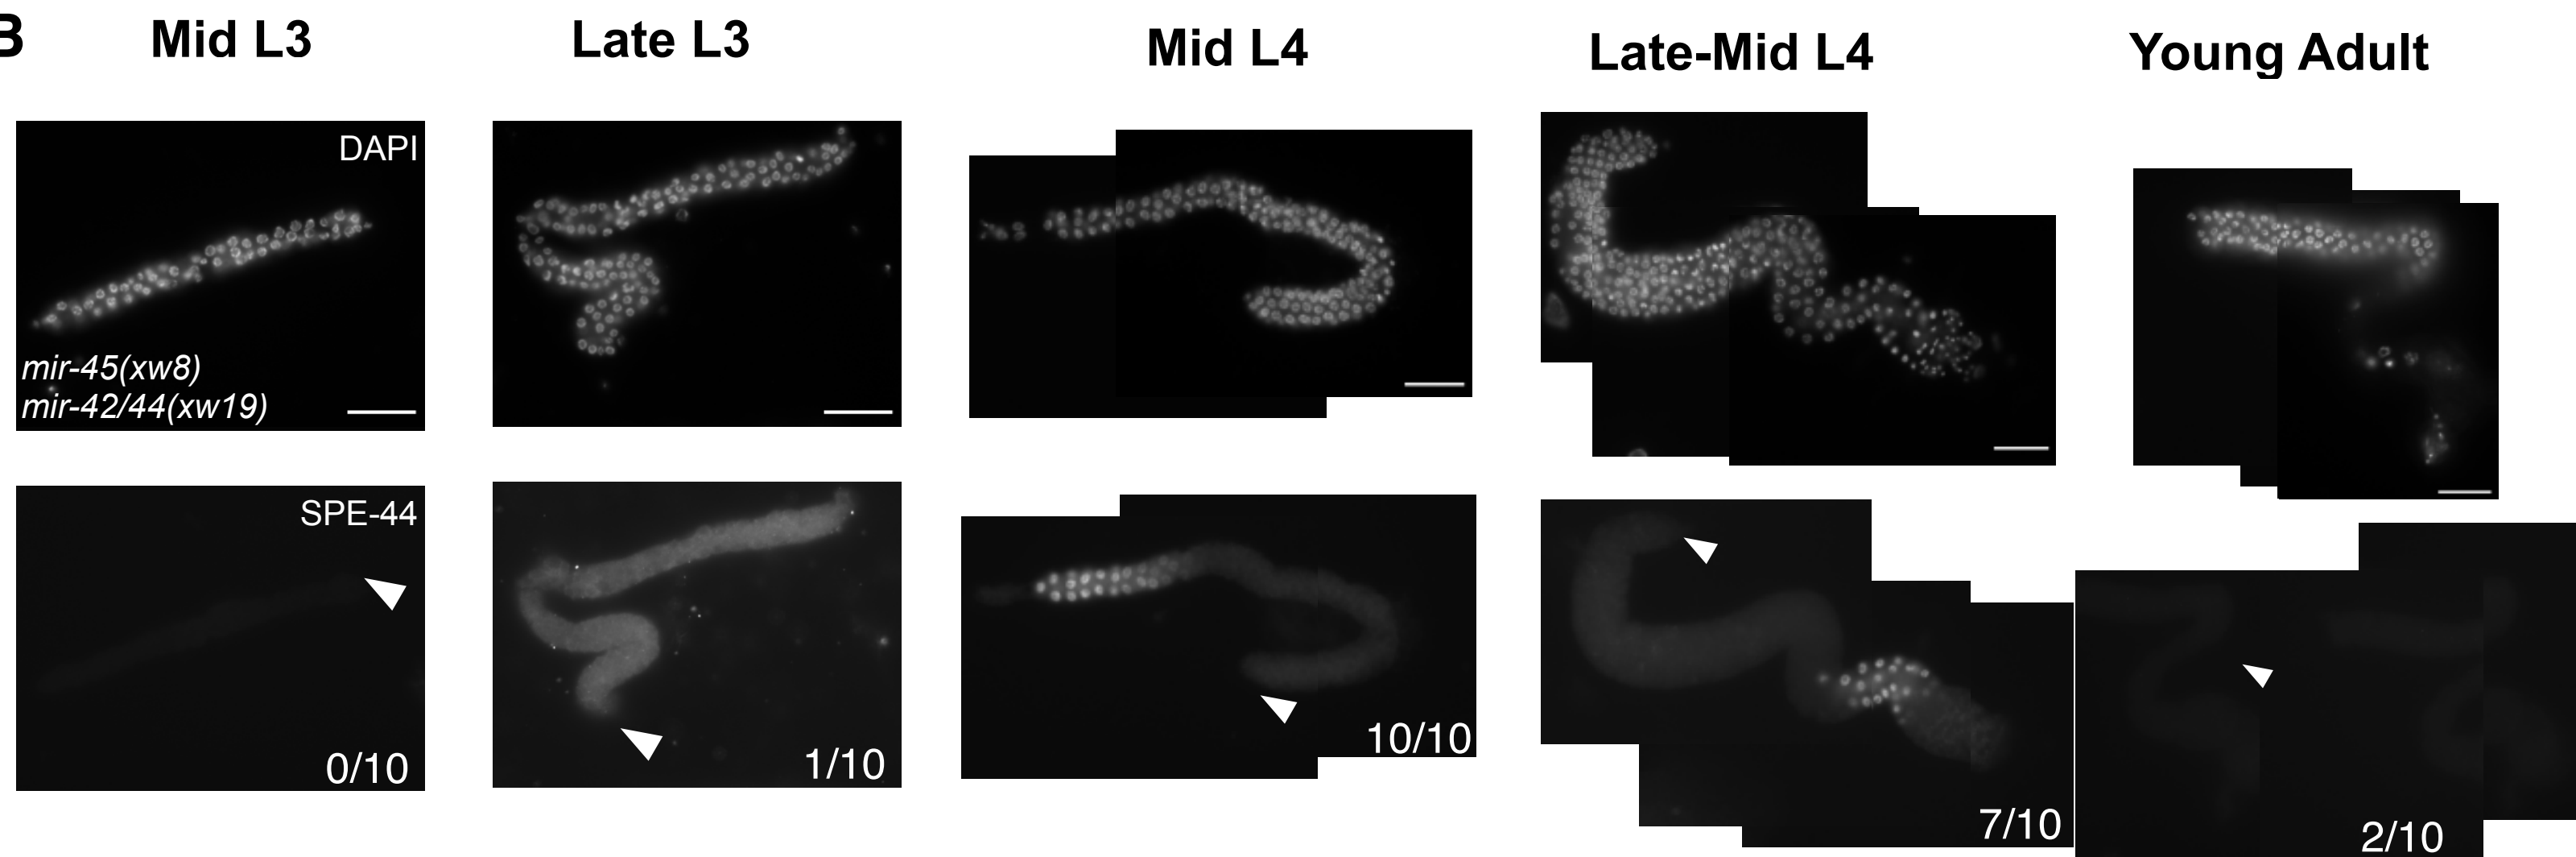

**Figure S2. *mir-44* and *mir-45* regulates the period of sperm production.** (A) Representative images of *his-72::gfp* gonad arms. Numbers in upper left corner indicate the number of images with *his-72::gfp* labelled sperm. Dotted line indicates region with sperm (B) Representative images of control and *mir-45(xw8)* *mir-44(xw19)* dissected germline arms labeled with antibody for SPE-44. Images from left to right show DIC, DAPI, and anti-SPE-44 labeling. Arrows indicate proximal end of germline and lines indicate SPE-44 labeled cells. Number in the lower right corner is the number of images captured that have similar phenotypes. All images were captured with a 200 ms exposure. Scale bars equal 25 micrometers.
