# Supplementary material
Source: publisher figshare collection journal article supplement (https://gsajournals.figshare.com/articles/dataset/_/13103411)
Supplement: Supplementary file 3 [file 1]

**A**

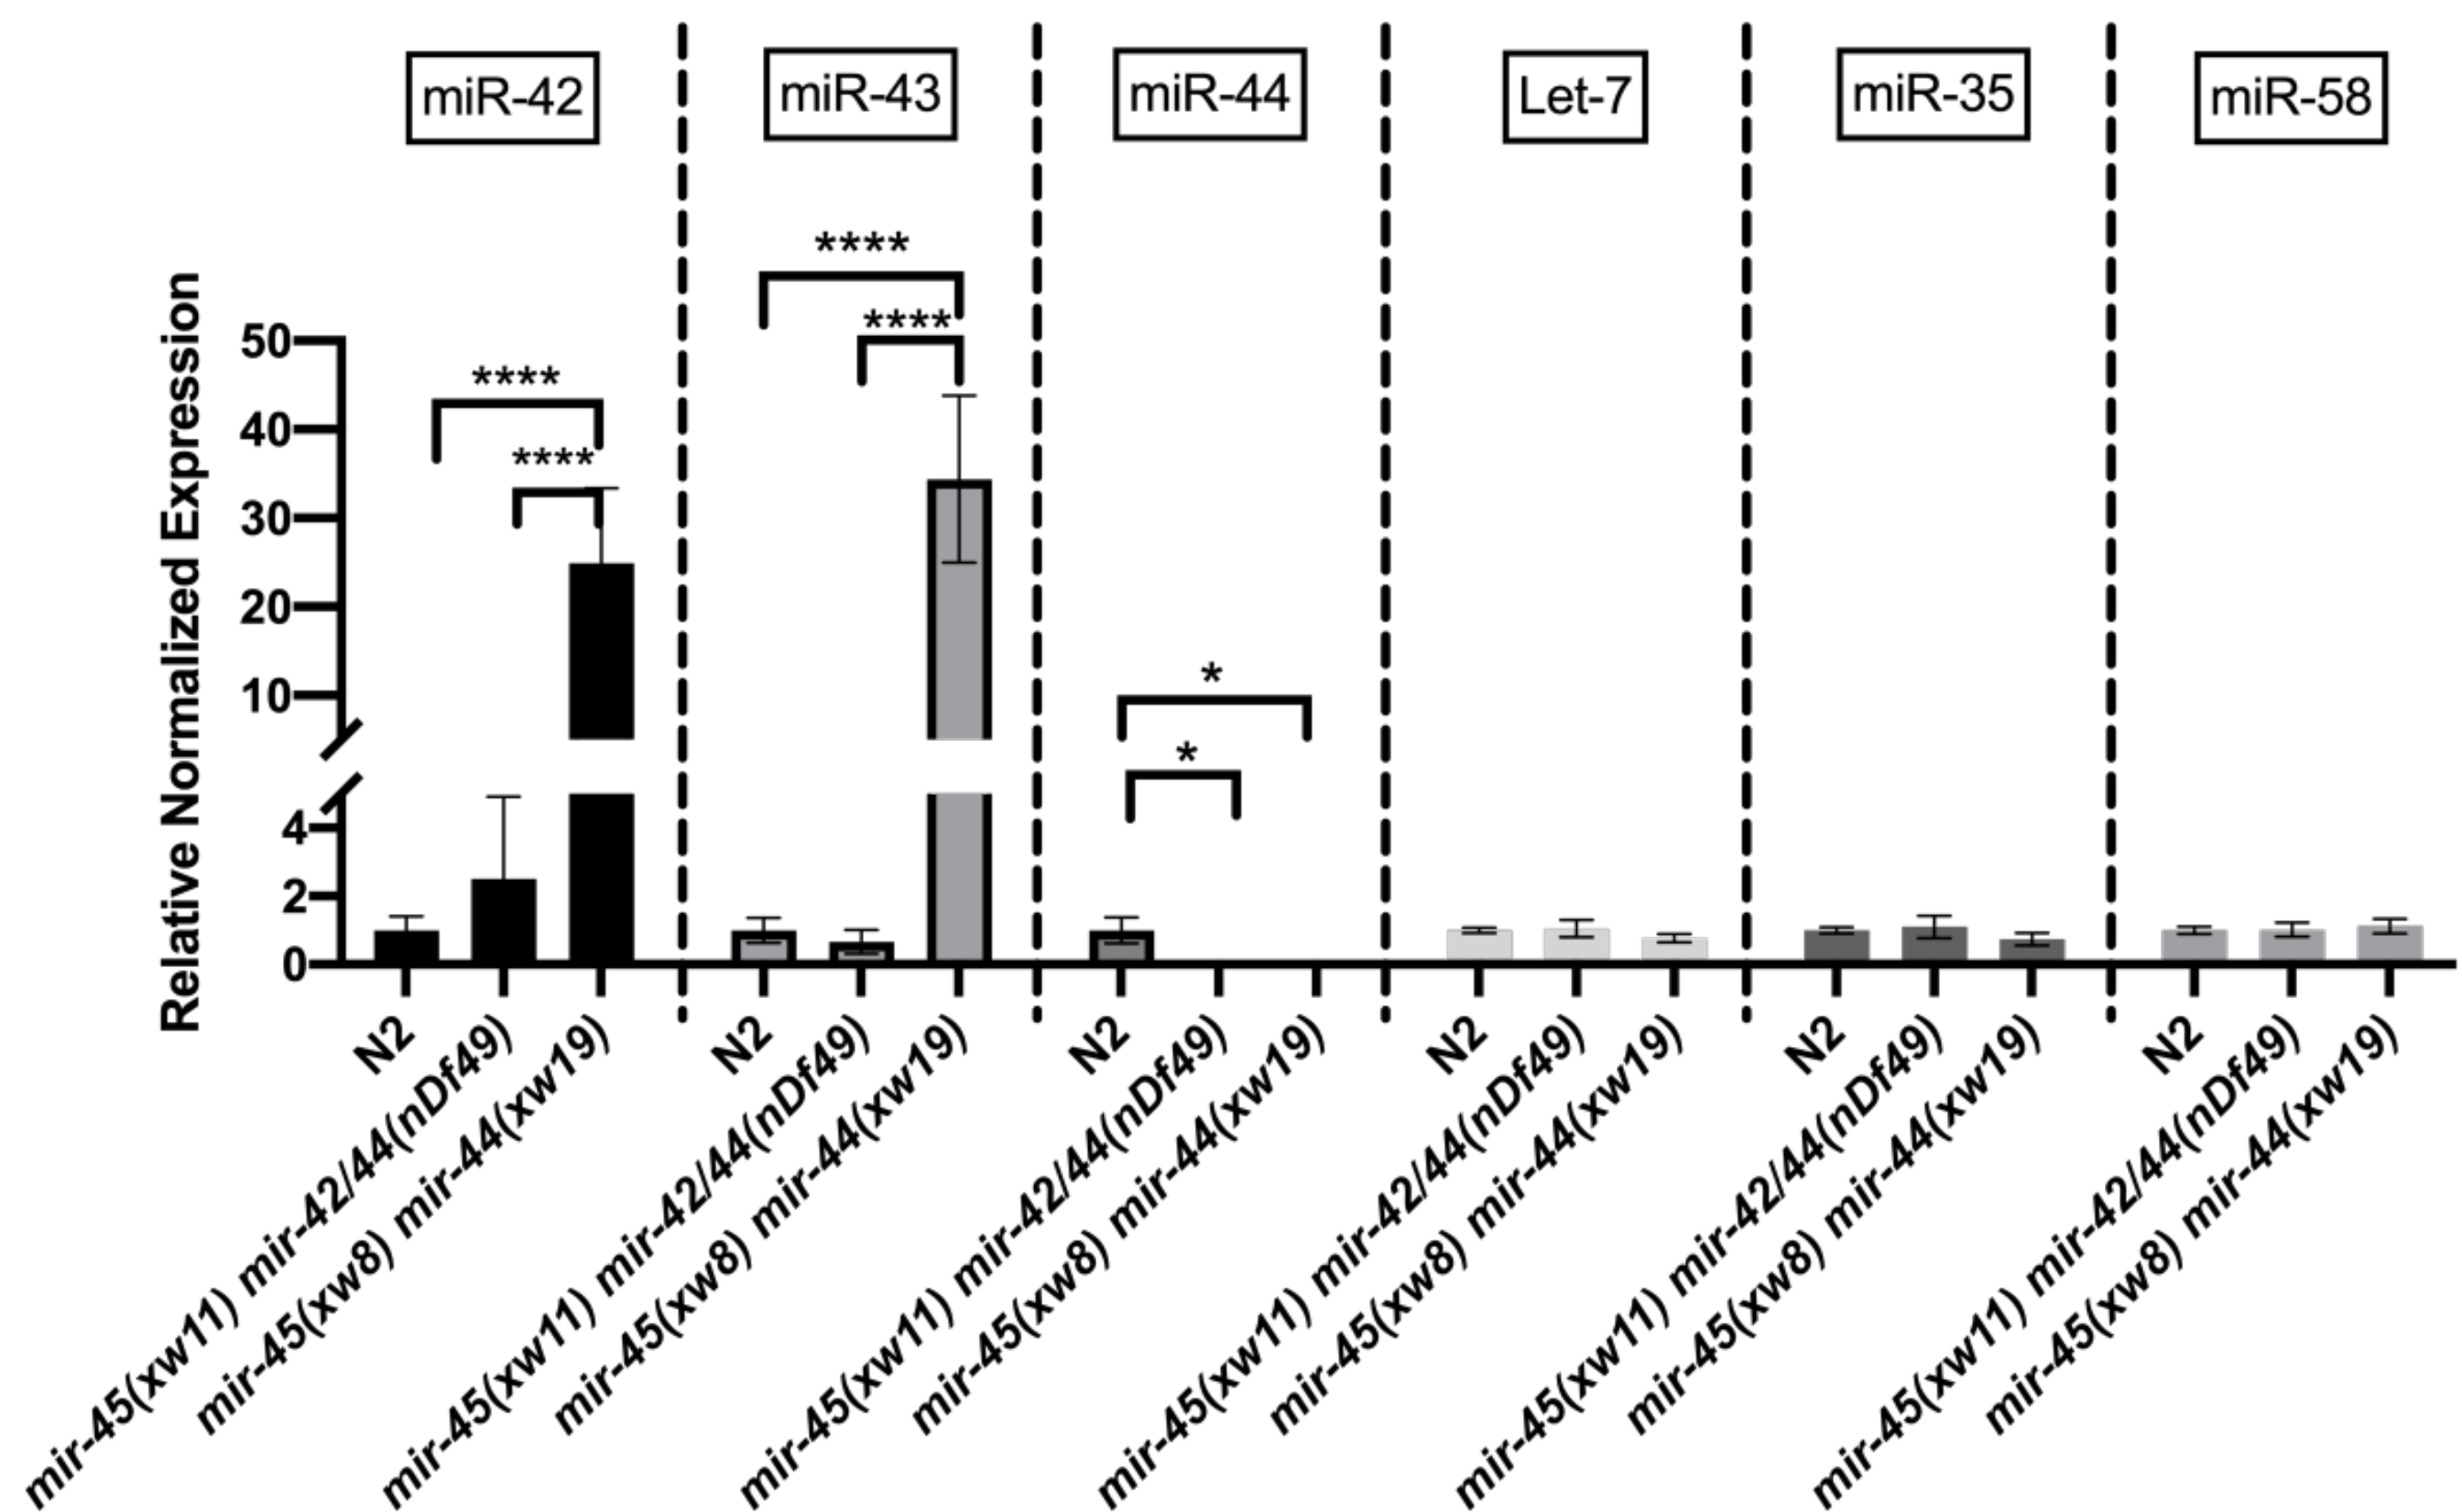

**B**

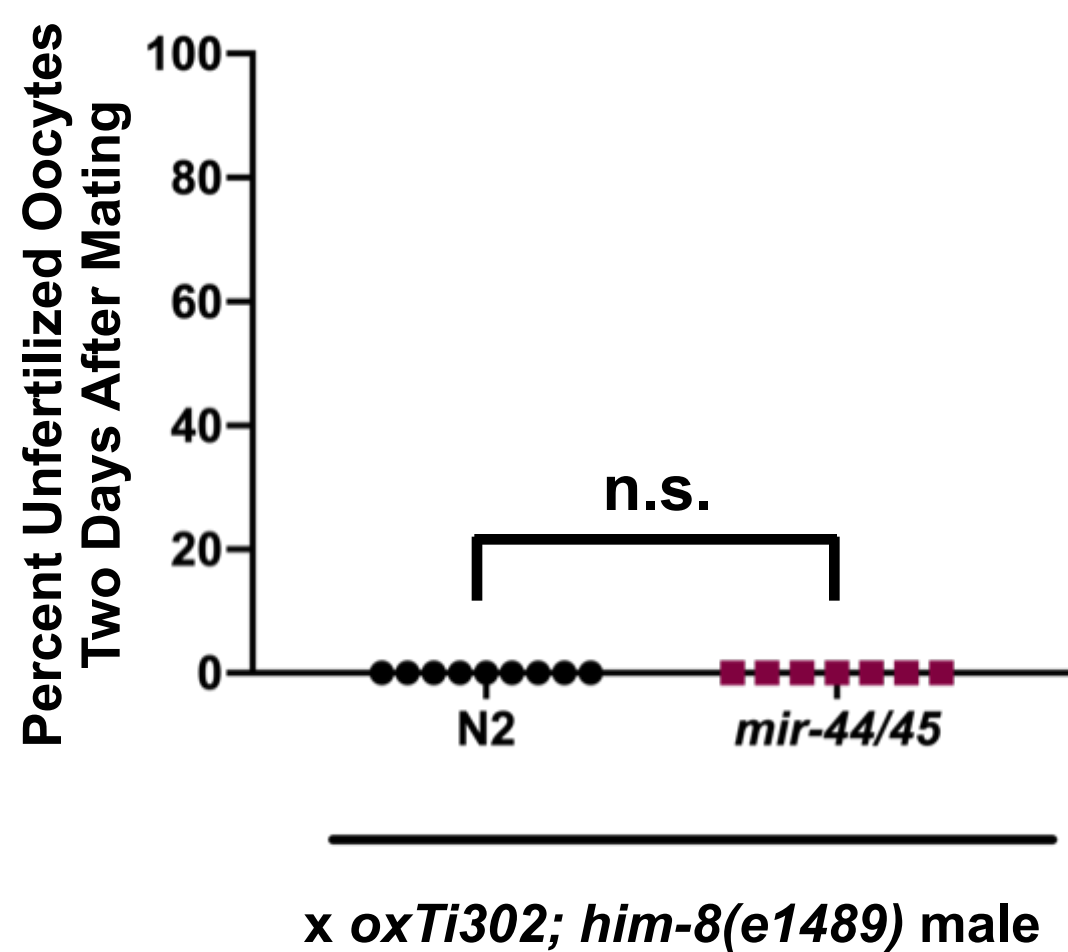

**C**

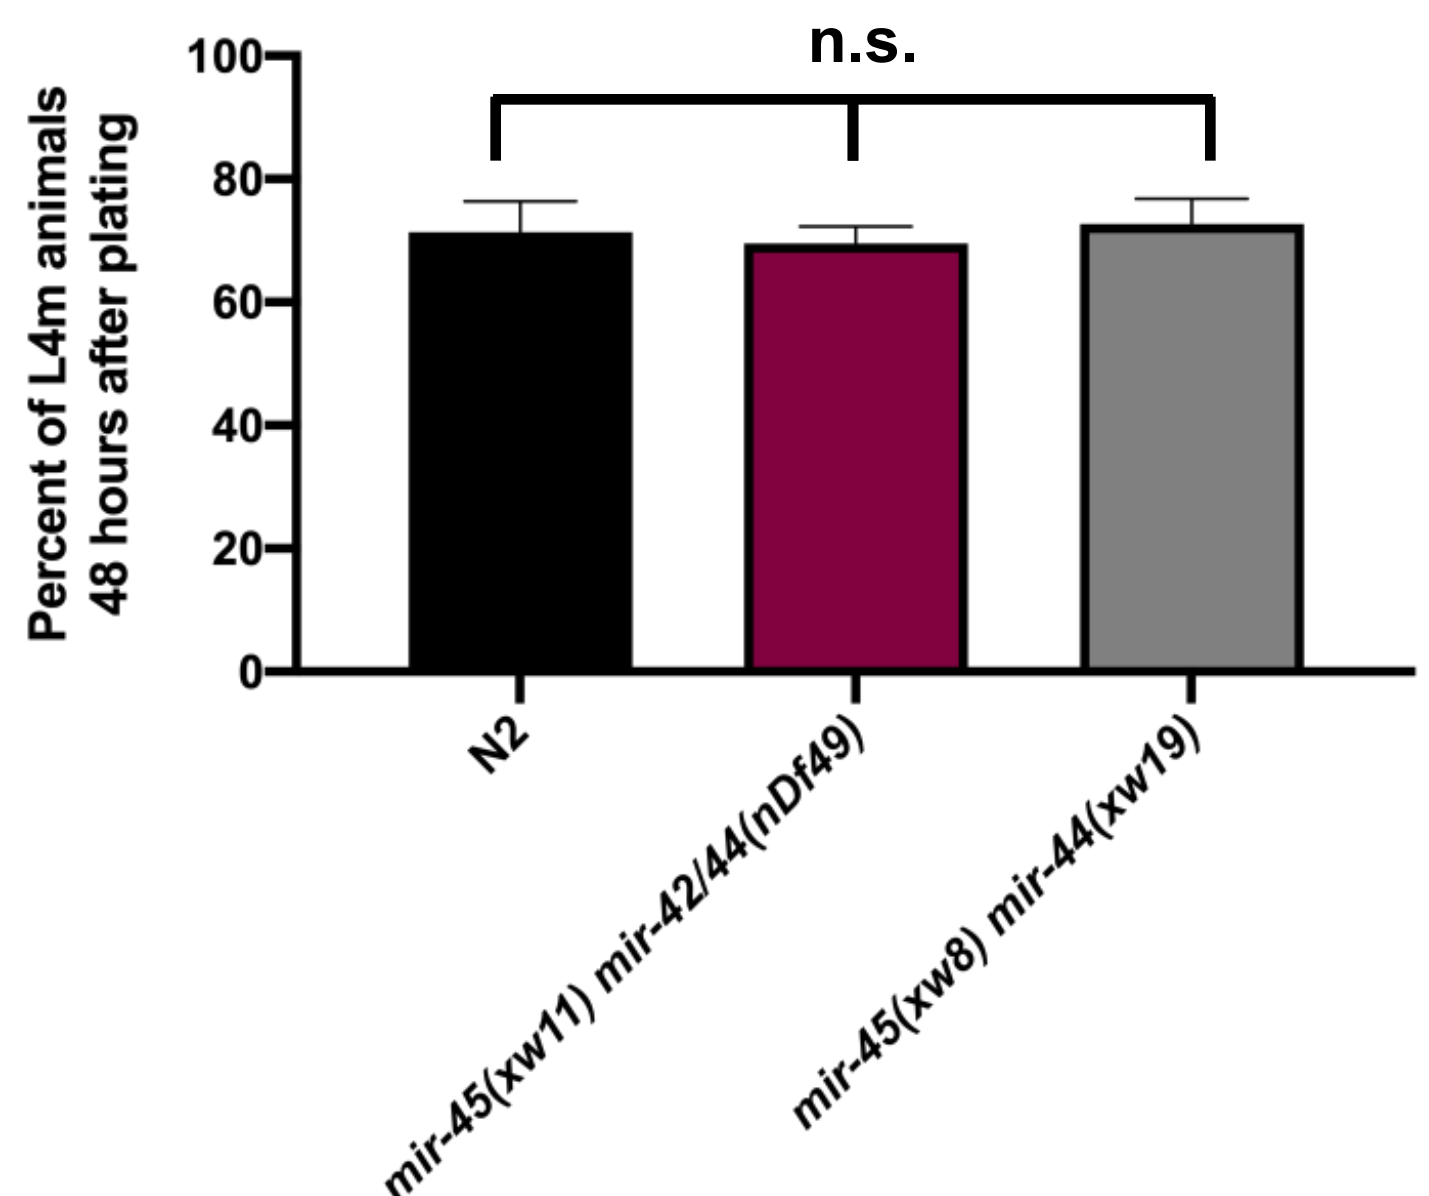

**Figure S1. Loss of *mir-44* and *mir-45* not do change the oocyte function or timing to adulthood** (A) RT-qPCR assay for miRNAs in N2, *mir-45(xw11) mir-42/44(nDf49)*, and *mir-45(xw8) mir-44(xw19)*. Data are represented relative to the N2 control as the mean  $\pm$  SEM of three biological replicates.  $p < 0.05$ . (B) Percent unfertilized oocytes produced on second and third day of the assay by N2 and *mir-45(xw11) mir-42/44(nDf49)* after mating with *oxTi302; him-8* males,  $p < 0.05$  ( $n = 10$ ). (C) Percent of animals in L4 molt at 48 hours after plating L1s. ( $n = 150$ ). \* $p < 0.05$ , \*\* $p < 0.01$ , \*\*\* $p < 0.001$ , \*\*\*\* $p < 0.0001$ , n.s. indicates  $p > 0.05$
