# Supplementary material
Source: publisher figshare collection journal article supplement (https://gsajournals.figshare.com/articles/dataset/_/13103411)
Supplement: Supplementary file 4 [file 1]

**A**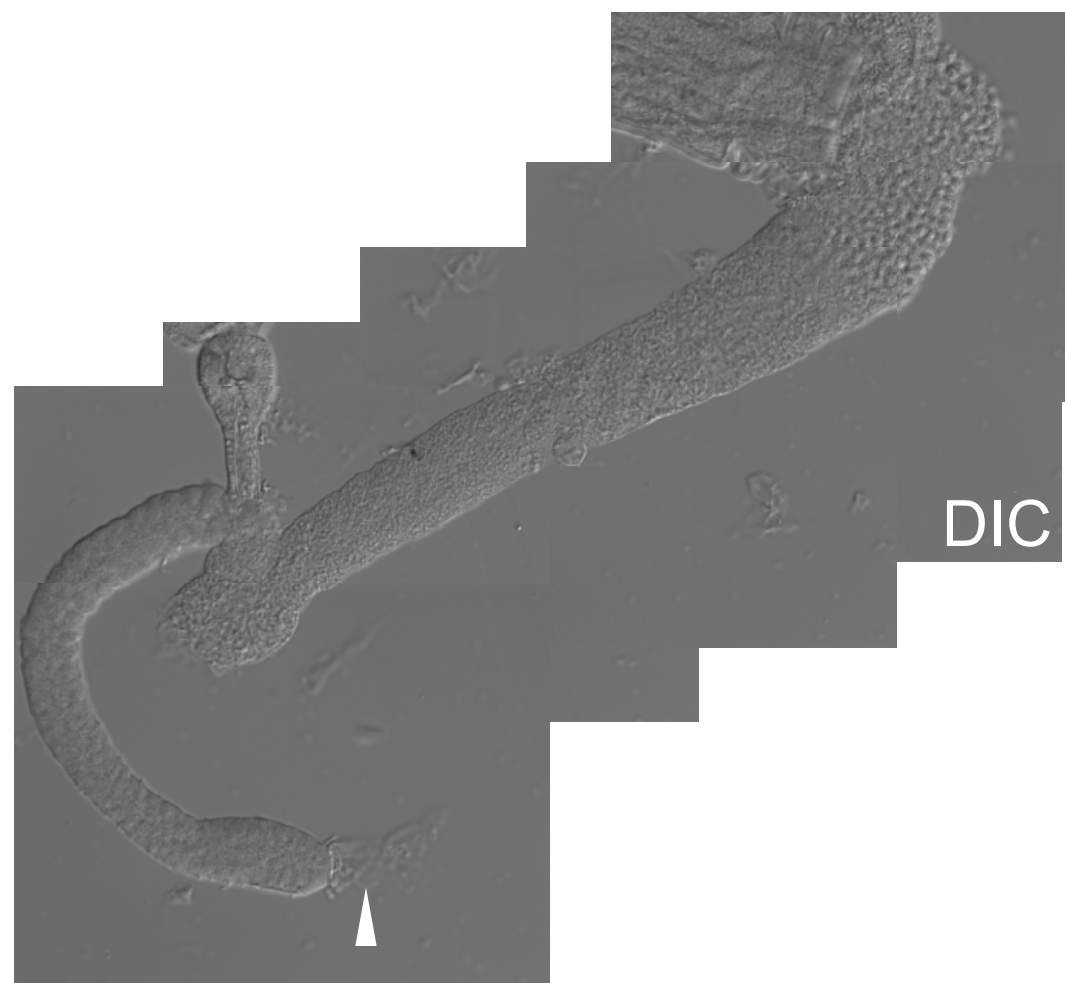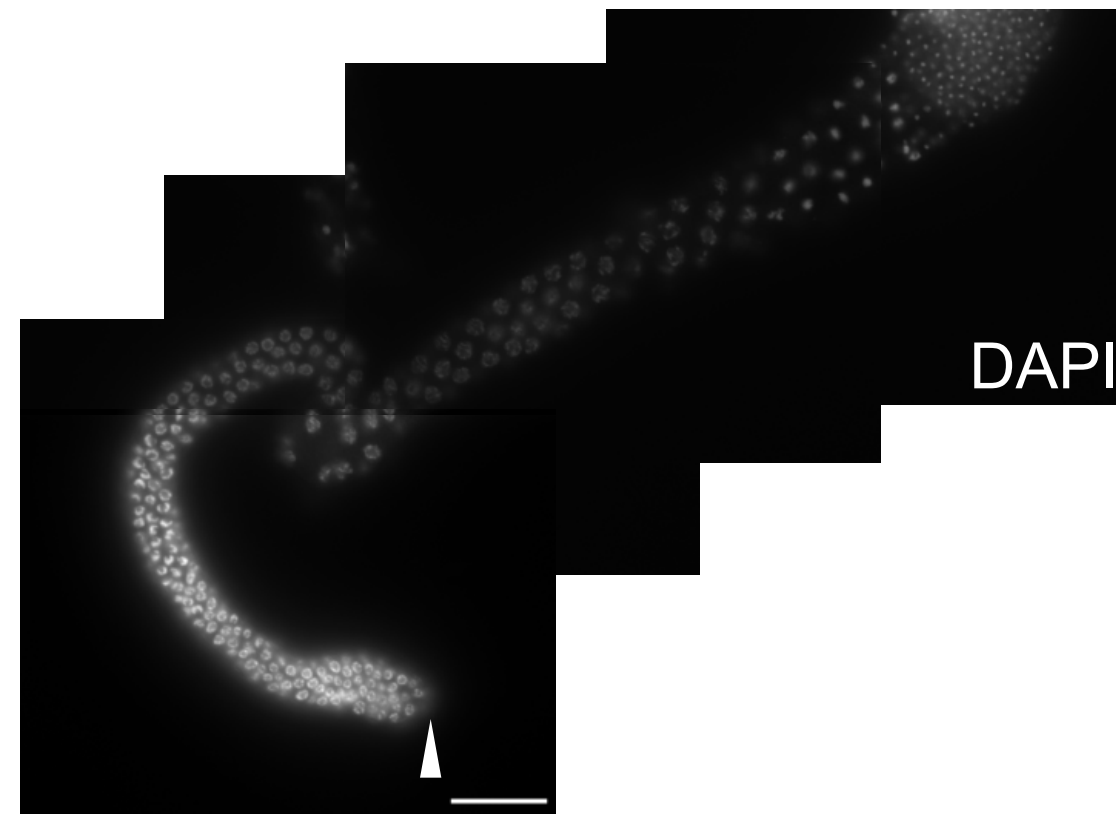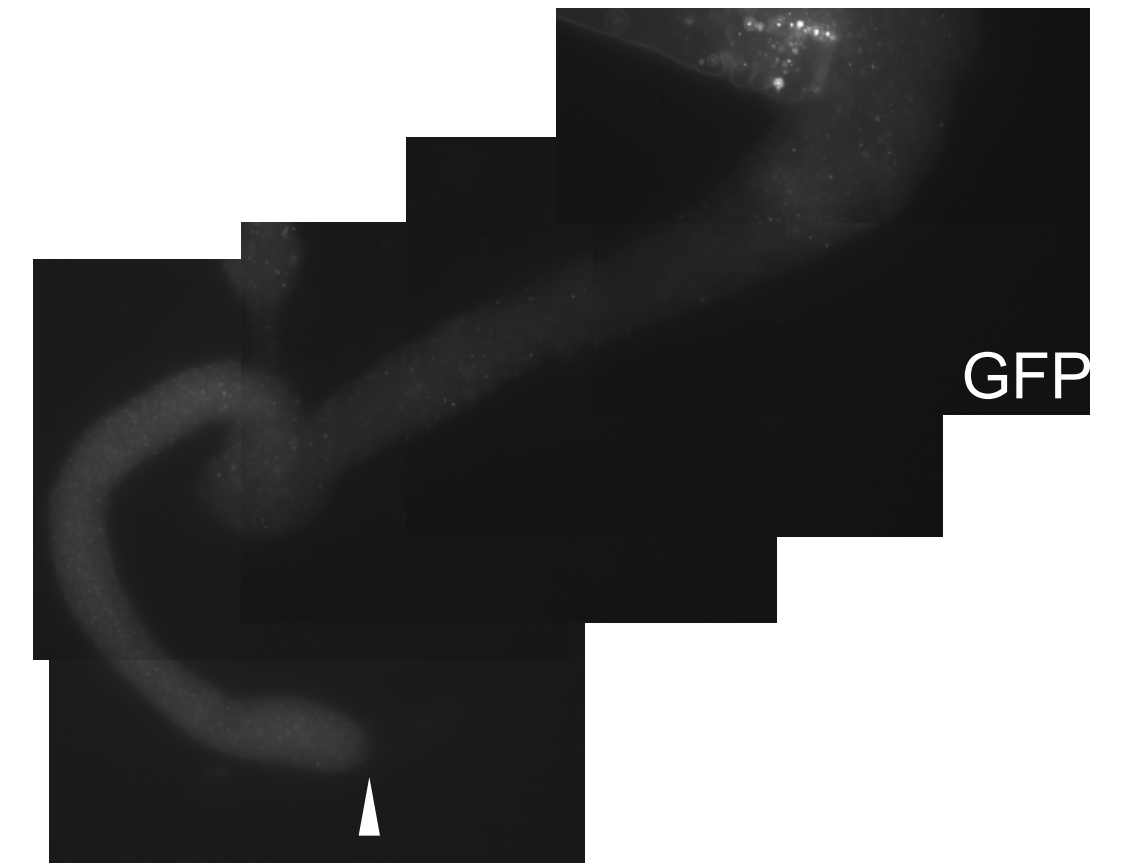**B**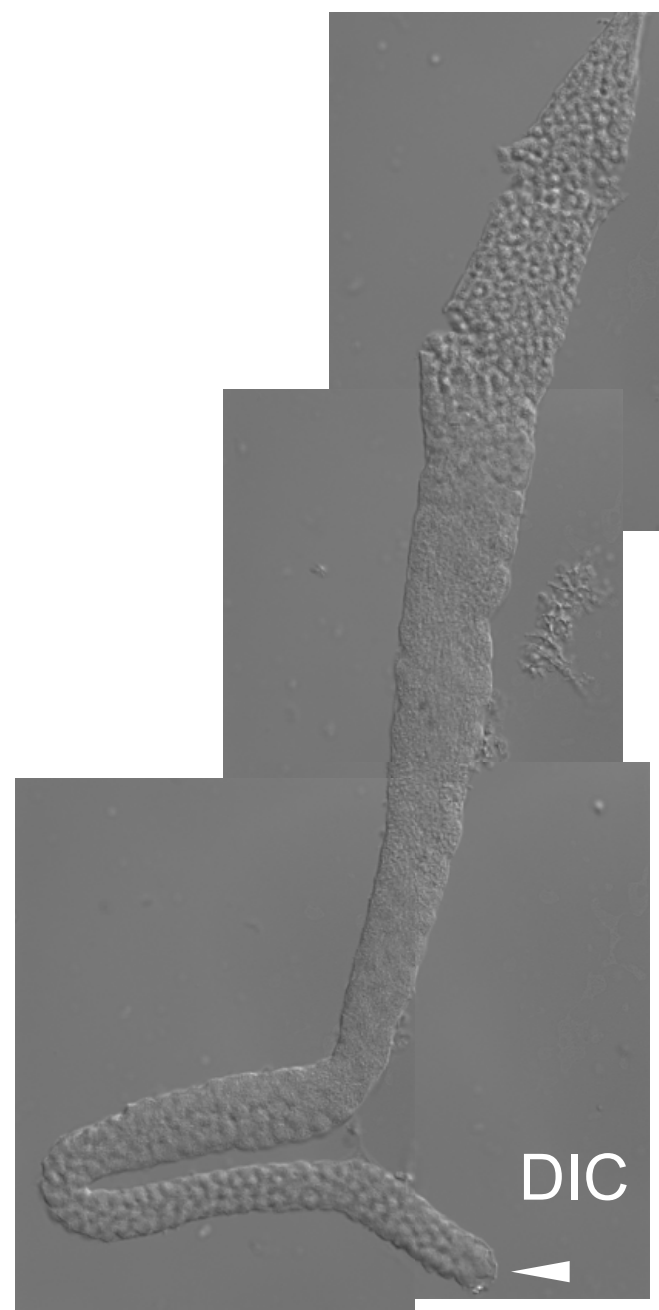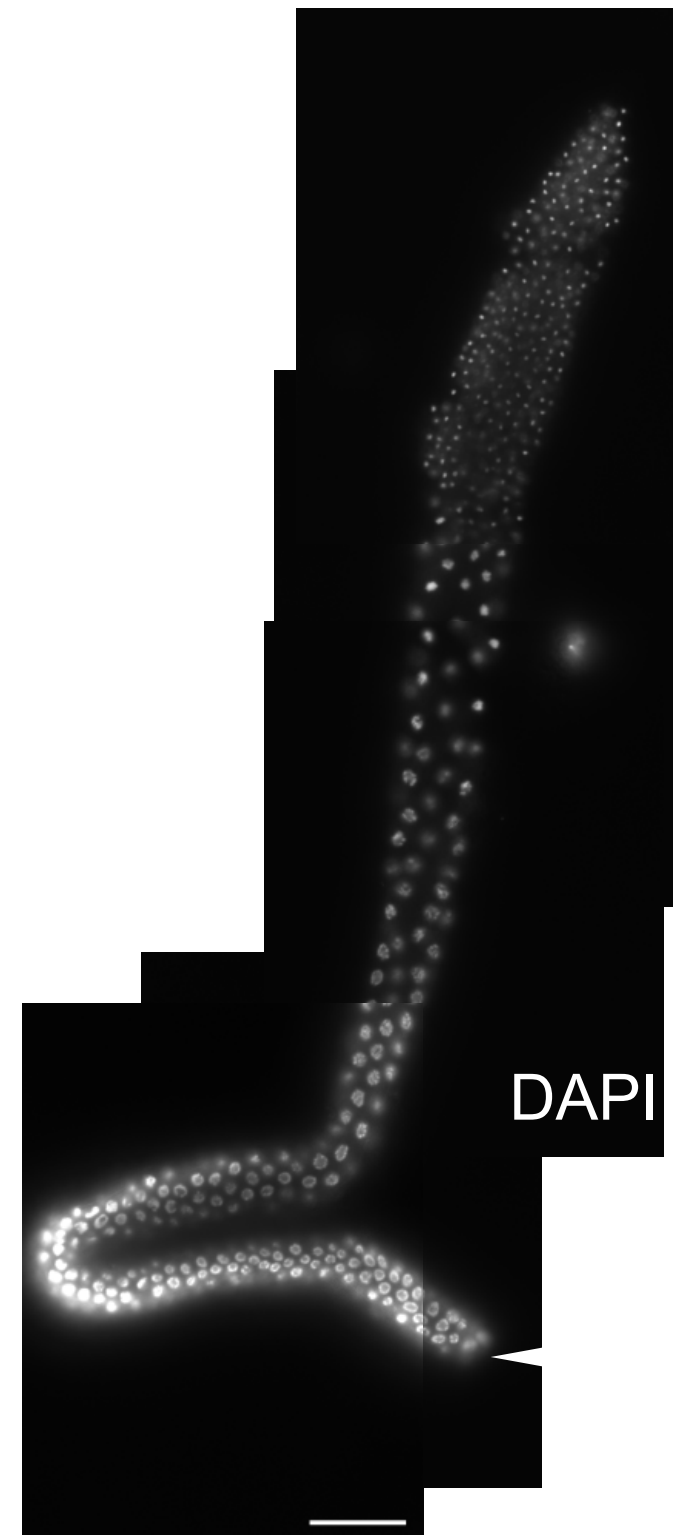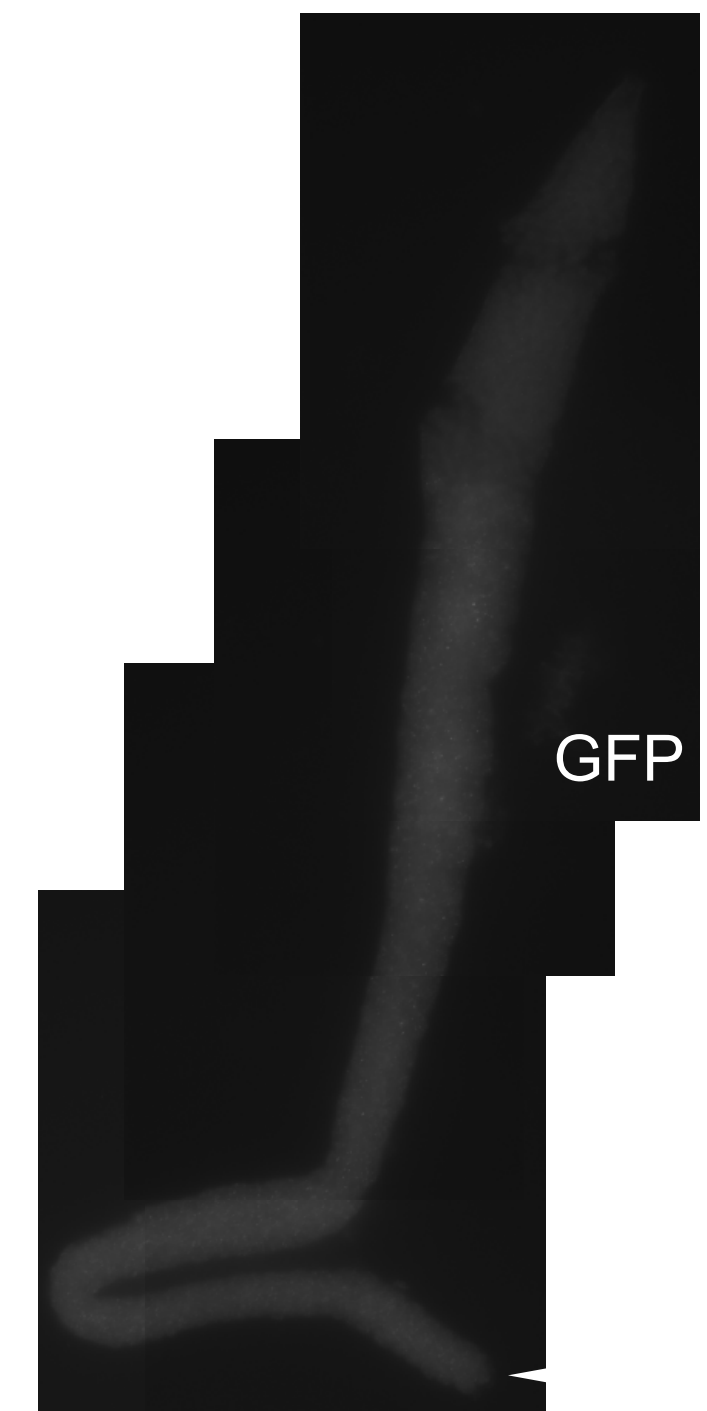

**Figure S3. *mir-45* is not detected in the male gonad arm.** *gfp* expression in young adult male *mir-45(xw8)* worms that have *gfp* inserted into the *mir-45* endogenous locus. (A) No transgene control. (B) *mir-45(xw8)*. (A-B) Dissected adult male germlines. Left to Right: DIC, DAPI and antibody-GFP. Arrow: distal end of gonad arm (n = 10 gonads per strain)
